## Abstract

Over the last several years, metagenomics has enabled the assembly of millions of new viral sequences that have vastly expanded our knowledge of Earth's viral diversity. However, these sequences range from small fragments to complete genomes and no tools currently exist for estimating their quality. To address this problem, we developed CheckV, which is an automated pipeline for estimating the completeness of viral genomes as well as the identification and removal of non-viral regions found on integrated proviruses. After validating the approach on mock datasets, CheckV was applied to large and diverse viral genome collections, including IMG/VR and the Global Ocean Virome, revealing that the majority of viral sequences were small fragments, with just 3.6% classified as high-quality (i.e. > 90% completeness) or complete genomes. Additionally, we found that removal of host contamination significantly improved identification of auxiliary metabolic genes and interpretation of viral-encoded functions. We expect CheckV will be broadly useful for all researchers studying and reporting viral genomes assembled from metagenomes. CheckV is freely available at:

<http://bitbucket.org/berkeleylab/CheckV>.

## Introduction

Viruses are the most abundant biological entity on earth, infect every domain of life, and are broadly recognized as key regulators of microbial communities and processes [1-4]. However, it is estimated that only a limited fraction of the viral diversity on Earth can be cultivated and studied under laboratory conditions [5]. For this reason, scientists have turned to metagenomic sequencing to recover and study the genomes of uncultivated viruses [6-8]. Typically, DNA or RNA is extracted from an environmental sample, fragmented, and then sequenced, generating millions of short reads that are assembled into contigs. Metagenomic viral contigs are then identified using computational tools and algorithms [9-11] that use a variety of viral-specific sequence features and signatures. In contrast to bacteria and archaea, most viral genomes are small enough that they can be recovered by a single metagenomic contig and do not require binning (e.g. shorter than 100 kb), with notable exceptions such as the giant viruses [12] and megaphages [13] with large genomes, or segmented viruses.

Assembly of viruses from metagenomes is challenging [14] and the completeness of assembled contigs can vary widely, ranging from short fragments to complete or near-complete genomes [15]. Small genome fragments may adversely affect downstream analyses including estimation of viral diversity, host prediction, or identification of core genes across viral taxa. Viral contigs can also be derived from integrated proviruses, in which case the viral sequence may be flanked on one or both sides by regions originating from the host genome. This type of host contamination also adversely affects downstream analyses, especially the estimation of viral genome size, characterization of viral gene content, and identification of viral-encoded metabolic genes [16].

For bacteria and archaea, genome quality can now be readily determined. The most widely adopted method, CheckM, estimates genome completeness and contamination based on the presence and copy number of widely distributed, single copy marker genes [17]. Because viruses lack widely distributed marker genes, the most commonly used approach with regard to completeness is to apply a uniform length threshold (e.g. 5 or 10 kb) and analyze all viral contigs

59 longer than this length. However, this "one-size-fits all" approach fails to account for the large  
60 variability in viral genome sizes, which range from 2 kb in *Circoviridae* [18] up to 2.5 Mbp in  
61 *Megaviridae* [12], and thus gathers sequences representing a broad range of genome  
62 completeness. Complete, circular genomes are commonly identified from the presence of direct  
63 terminal repeats [5-7], and sometimes from mapping paired-end sequencing reads [19], but tend  
64 to be rare. VIBRANT [11] is a recently published tool that categorizes sequences into high-,  
65 medium-, or low-quality tiers based on circularity and the presence of viral hallmark proteins,  
66 but does not estimate genome completeness per se.

67

68 With regard to contamination, existing approaches either remove viral contigs containing a high  
69 fraction of microbial genes [5] or predict host-virus boundaries on proviruses [10, 11, 20, 21].  
70 The former approach allows for a small number of microbial genes while the latter approach  
71 may misidentify the true host-virus boundary. Other approaches detect viral signatures, but do  
72 not account for the presence of microbial regions whatsoever [9]. With the diversity of available  
73 viral prediction pipelines and protocols, there is a need for a standalone tool to ensure that viral  
74 contigs are free of host contamination, and to remove it when present.

75

76 Here, we present CheckV, a new tool to automatically estimate completeness and contamination  
77 for metagenome-assembled viral genomes. By collecting an extended database of complete viral  
78 genomes from both isolates and environmental samples, CheckV was able to estimate the  
79 completeness for the vast majority of contigs in the IMG/VR database, illustrating its broad  
80 applicability to newly assembled genomes across viral taxa and Earth's biomes. In addition,  
81 CheckV uses a new approach comparing the gene content between contiguous sliding windows  
82 along each sequence to identify putative host contamination on contig's edges stemming from  
83 the assembly of integrated proviruses. Application to the IMG/VR database revealed that this  
84 type of contamination was rare but could easily lead to wrongful interpretation of viral genome  
85 size and viral-encoded metabolic genes.

86

## 87 **Results**

88

### 89 **A framework for assessing viral genome quality**

90

91 CheckV is a fully automated, command-line tool for assessing the quality of metagenome-  
92 assembled viral genomes. It is organized into three modules which identify and remove host  
93 contamination on proviruses (Figure 1A), estimate completeness for genome fragments (Figure  
94 1B), and predict closed genomes based on terminal repeats and provirus integration sites  
95 (Figure 1C). Based on these results, the program classifies each sequence into one of five quality  
96 tiers (Figure 1D) - complete, high-quality (>90% completeness), medium-quality (50-90%  
97 completeness), low-quality (0-50% completeness), or undetermined-quality (no completeness  
98 estimate available) - which are consistent with and expand upon the MIUViG standards [15].  
99 Because host contamination is easily removed, it is not factored into these quality tiers.

100

101 In the first step, CheckV identifies and removes non-viral genes on the edges of contigs, which  
102 can occur for assembled proviruses (Figure 1A and Methods). Genes are first annotated as either  
103 viral or microbial (i.e. from bacteria or archaea) based on comparison to a large database of  
104 15,958 profile hidden markov models (HMMs) (Figure S1 and Table S1). We selected these  
105 HMMs from seven reference databases using three main criteria: high specificity to either viral or

106 microbial proteins, commonly occurring in either viral or microbial genomes, and non-  
 107 redundant compared other HMMs. Starting at the 5' edge of the contig, CheckV compares these  
 108 gene annotations as well as GC content between a pair of sliding windows that each contain up to  
 109 40 genes. This information is then used to compute a score at each intergenic position and  
 110 identify host-virus boundaries. We optimized this approach to sensitively and specifically detect  
 111 flanking host regions, even those containing just a single gene.  
 112

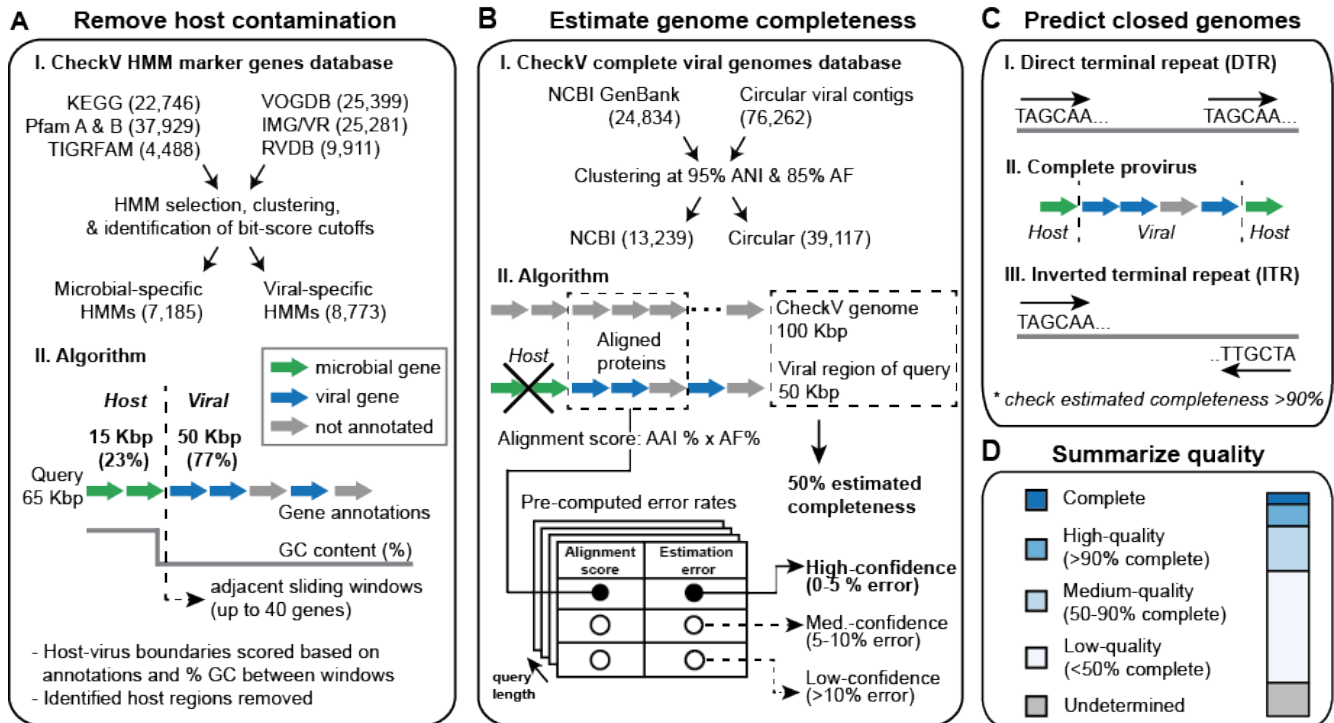

113  
 114  
 115 **Figure 1. A framework for assessing the quality of metagenome-assembled viral genomes.** CheckV estimates  
 116 the quality of viral contigs from metagenomes in three main steps. A) First, CheckV identifies and removes non-viral  
 117 regions on proviruses using an algorithm that leverages gene annotations and GC content. B) CheckV estimates the  
 118 genome completeness based on AAI to a large database of complete viral genomes derived from NCBI GenBank and  
 119 environmental samples and reports a confidence level for the estimate. C) Closed genomes are identified based  
 120 either on direct terminal repeats, prophage integration sites, or inverted terminal repeats. When possible, these  
 121 predictions are validated based on the estimated completeness obtained in B. D) Finally, sequences are assigned to  
 122 one of five different quality tiers based on their estimated completeness. (ANI: average nucleotide identity; AF:  
 123 alignment fraction; AAI: average amino acid identity).  
 124

125 In the second step, CheckV estimates the expected genome length of contigs based on the  
 126 average amino acid identity (AAI) to a database of complete viral genomes from NCBI and  
 127 environmental samples (Figure 1B and Methods). The expected genome length is then used to  
 128 estimate completeness as a simple ratio of lengths. In contrast to bacteria and archaea, genome  
 129 size is relatively conserved among related viruses, particularly at the family or genus ranks [15],  
 130 which enables CheckV to infer the expected genome length of a new virus based on its hits to the  
 131 genome database. For example, genome lengths differed by only 12.5% on average (IQR = 4.2%  
 132 to 16.7%) for viruses displaying just 30-40% AAI over at least 10% of their genes (Figure S2).  
 133 Rather than set an arbitrary threshold, we empirically derived the relationship between genome  
 134 similarity and genome size variation, which is stored as a lookup table in the database. Using this  
 135 table, together with the observed similarity and contig length, CheckV reports the confidence of

136 each estimate: high-confidence (0-5% error), medium-confidence (5-10% error), or low-  
137 confidence (>10% error).

138  
139 Highly novel viruses can be too diverged from CheckV genomes to obtain a high- or medium-  
140 confidence completeness estimate based on AAI. In these cases, CheckV uses a more sensitive  
141 HMM-based approach. After annotation with the viral HMMs (Figure 1A), CheckV compares the  
142 length of the viral contig to the lengths of CheckV reference genomes that are annotated by the  
143 same HMMs. Using this information, CheckV is able to obtain a conservative estimate of genome  
144 completeness (i.e. maximum completeness value that can be ascertained with >95% probability).

145  
146 In the last step, CheckV predicts closed genomes based on direct terminal repeats (DTRs),  
147 inverted terminal repeats (ITRs), and provirus integration sites. CheckV identifies DTRs and ITRs  
148 based on a repeated sequence of at least 20-bp at the start and end of a contig. While DTRs can  
149 play a role in genome integration [22], they largely result from assembling short reads from a  
150 circular genome [23] or a linear genome that has been circularly permuted by a replication  
151 mechanism involving a concatemer intermediary [24]. Inverted terminal repeats (ITRs) are a  
152 hallmark of transposons [25] but have also been observed in complete viral genomes [26] and  
153 phages [27]. Complete proviruses are identified by a viral region flanked by host DNA on both  
154 sides, which is a commonly used approach [10, 11, 20, 21].

## 155 156 **An expanded database of complete viral genomes from metagenomes**

157  
158 We initially formed the CheckV genome database using 24,834 viral genomes from NCBI  
159 GenBank [28] (Table S2). However, uncultivated identified viruses commonly display little to no  
160 similarity to reference databases [5]. To mitigate this issue and expand the diversity of the  
161 database, we used CheckV to perform a systematic search for metagenomic viral contigs with  
162 DTRs (DTR contigs) from over 14.4 billion contigs (9.7 Tb) derived from publicly available and  
163 environmentally diverse metagenomes, metatranscriptomes, and metaviromes downloaded  
164 from: IMG/M [29], MGnify [30], and recently published studies of the human microbiome [31-33]  
165 and ocean virome [6] (Figure 2 and Methods). We exclusively used DTRs to identify complete  
166 genomes as this is the most well-established approach [5-7].

167  
168 Using this approach, we identified 76,262 DTR contigs after carefully filtering out potential false  
169 positives and verifying completeness (Figure S3 and Table S3). These were subsequently de-  
170 replicated to 39,117 sequences at 95% ANI (average nucleotide identity) over 85% of the length  
171 of both sequences (Table S4). DTR contigs were found in diverse environments including human  
172 gut (35.8%), marine (19.7%), freshwater (9.7%), and soils (7.0%) and were derived from major  
173 clades of DNA viruses, including *Caudovirales* (69.1%), *Microviridae* (11.4%), and CRESS viruses  
174 (2.3%) (Figure 2A-B). DTR contigs were also identified for RNA viruses (i.e. *Riboviria*, N=83) and  
175 retroviruses (i.e. *Retrovirales*, N=1,698), which were further confirmed through identification of  
176 marker genes (e.g. RdRp) and association to known viral families (Supplementary Information).

177

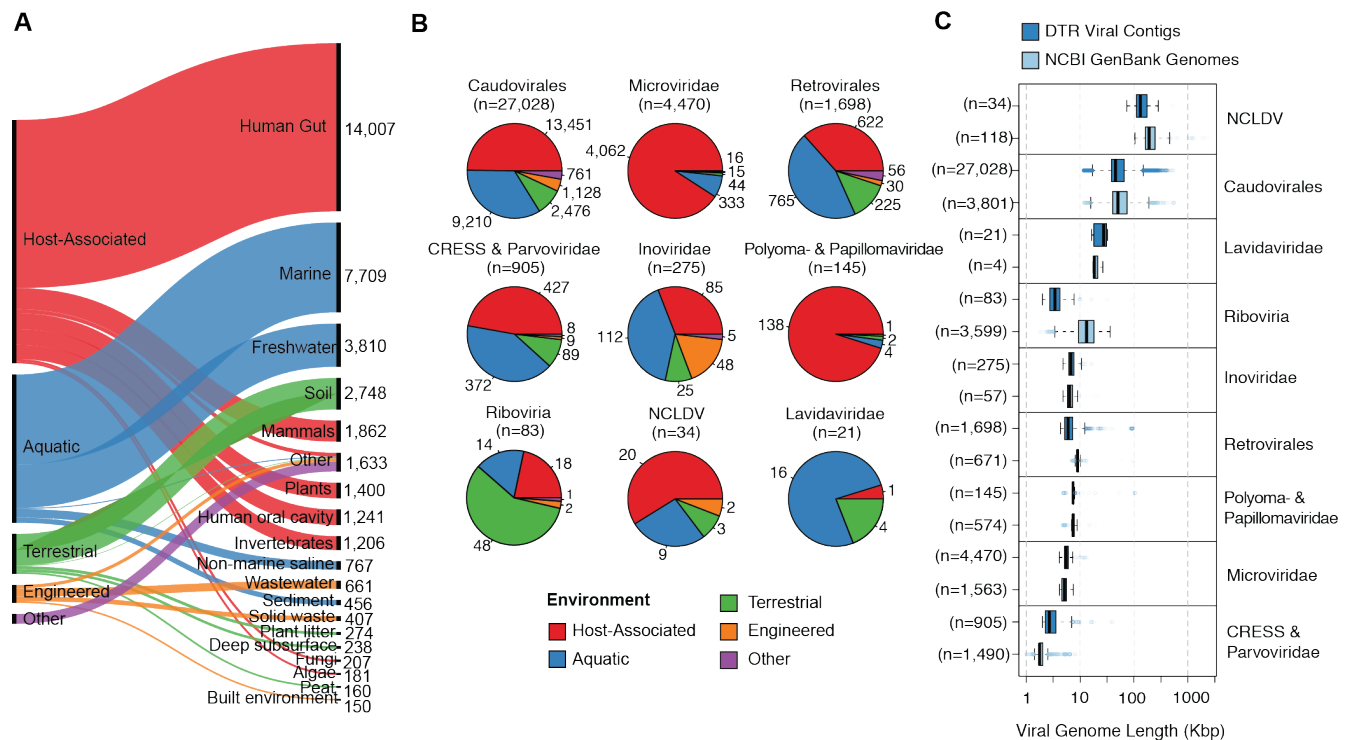

178  
179  
180  
181  
182  
183  
184  
185  
186

**Figure 2. An expanded reference database of environmentally diverse genomes.** 76,262 DTR contigs were identified from publicly available metagenomes, metatranscriptomes, and viromes and were clustered into 39,117 non-redundant genomes at 95% ANI. A) The non-redundant genomes are derived from diverse human-associated and environmental habitats. Habitats are based on the GOLD (Genomes OnLine Database) ontology [34] and visualization was made using RAWgraphs [35]. B) The 39,117 genomes were taxonomically annotated based on clade-specific marker genes from the VOG database. C) Comparison between GenBank genomes and DTR contigs for different viral clades.

187  
188  
189  
190  
191  
192  
193  
194  
195  
196  
197

Next, we compared the 76,262 DTR contigs to the 24,834 GenBank references and de-replicated all sequences again at 95% ANI resulting in 52,141 clusters. Overall, the addition of DTR contigs resulted in a 3.9-fold increase in the number of clusters (Figure 1B), which was particularly pronounced for the *Caudovirales* order (7.1-fold increase) (Figure 2B). In contrast, GenBank genomes had improved representation of other viral clades, including RNA viruses from the *Riboviria* realm (Table S5). For most viral clades, the sizes of DTR contigs and GenBank genomes were consistent, indicating no systematic artifacts in our data (Figure 2B). One interesting exception was for segmented RNA viruses (*Riboviria* and *Retrovirales*), in which the DTR contigs tended to be smaller than the GenBank references, suggesting they represent a single genome segment or may only cover a subset of the diversity within these large groups.

198  
199

### Accurate estimation of completeness and contamination

200  
201  
202  
203  
204  
205  
206  
207

Having developed the CheckV pipeline and databases, we next benchmarked its accuracy. To evaluate genome completeness, we generated a mock dataset containing fragments from 382 bacteriophages not included in the CheckV database (Table S6). Using a combination of the AAI- and HMM-based approaches, CheckV estimated completeness with a median unsigned error (MUE) of only 0.91% (Figure 3A-B). Several of the genomes in the mock dataset were closely related to a CheckV reference, which may be unrealistic when analyzing real metagenomes. To simulate novel viruses, we reran the program using only reference genomes that displayed low similarity to genomes in the mock dataset (Table S7). As similarity decreased, CheckV

208 automatically switched from using the AAI-based approach to the more sensitive, but less  
 209 accurate HMM-based approach. As a result, the MUE increased from 0.91% when using the full  
 210 CheckV database to 5.5% when using only highly diverged references (e.g. <30% AAI compared  
 211 to the mock dataset), but enabled CheckV to estimate completeness for >96% of all fragments.  
 212

213 For comparison, we applied VIBRANT to the mock dataset, which is currently the only available  
 214 tool to assess viral genome completeness (Figure 3C). VIBRANT does not estimate completeness,  
 215 per se, but it assigns fragments to four quality tiers. Compared to the true completeness values,  
 216 VIBRANT's quality tiers displayed lower correlations ( $R^2 = 0.35$ ) than CheckV's estimated  
 217 completeness ( $R^2 = 0.96$ ) or CheckV's quality tiers ( $R^2 = 0.78$ ).  
 218

219 Next, we evaluated CheckV's accuracy in detecting host contamination on provirus sequences  
 220 (Table S8). To generate mock proviruses, we paired the 382 bacteriophages with their bacterial  
 221 and archaeal hosts from the Genome Taxonomy Database [36], inserting each phage at a random  
 222 location in its host genome, and extracting genome fragments of varying length (5 to 50 kb) and  
 223 amount of host sequence (10 to 50%). As a negative control, we generated genome fragments  
 224 that were entirely viral. Overall, CheckV correctly classified 76.5% of mock proviruses (Figure  
 225 3D) while incorrectly classifying only 0.9% of the entirely viral sequences (Figure 3E). CheckV  
 226 was also able to accurately estimate the length of the host region on proviruses (Figure 3F) but  
 227 was less sensitive for shorter genome fragments (Figure S4).  
 228

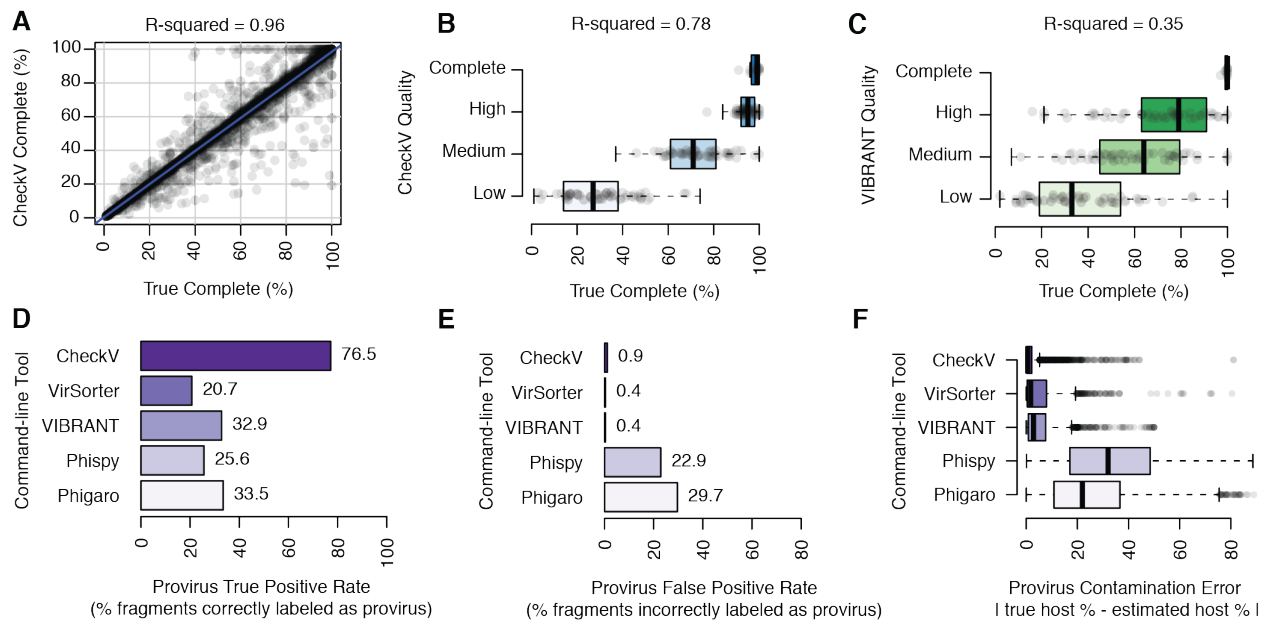

229  
 230  
 231 **Figure 3. Benchmarking CheckV and comparison with existing tools.** A-C) Benchmarking genome completeness  
 232 on a mock dataset of bacteriophage genome fragments. A) CheckV's estimated completeness versus true  
 233 completeness. B) CheckV's quality tiers versus true completeness. C) VIBRANT's quality tiers versus true  
 234 completeness. D-F) Benchmarking detection of host regions for CheckV and existing tools on a mock dataset of  
 235 genome fragments from proviruses. Proviruses were identified as any genome fragment with a predicted viral  
 236 region that covered <95% of its length. D) The percent of provirus fragments correctly identified by each tool. E) The  
 237 percent of viral fragments incorrectly classified as proviruses by each tool. F) The error in estimated contamination  
 238 (i.e. percent of contig length derived from host genome) for correctly identified proviruses.  
 239  
 240

241 For comparison, we evaluated four commonly used tools for identifying host-provirus  
242 boundaries, including VIBRANT [11], VirSorter [10], PhiSpy [20], and Phigaro [21]. To enable  
243 comparability between tools, proviruses were defined as any genome fragment with a predicted  
244 viral region that covered <95% of the fragment length. Overall, none of the tools sensitively  
245 detected mock proviruses (range = 20.7 to 33.5%; Figure 3D), particularly when fragments were  
246 short, or host contamination was low (Figure S4). For example, VirSorter detected only 1.5% of  
247 proviruses with <20% contamination and only 5.1% shorter than 20 kb. This implies that  
248 microbial genes at the edges of viral contigs may be overlooked by existing tools and interpreted  
249 as viral-encoded functions. In contrast, other tools identified host-virus boundaries on entirely  
250 viral sequences (Figure 3E). For example, PhiSpy predicted non-viral regions on 22.9% of  
251 entirely viral fragments which covered 26.3% of the length of these sequences on average. This  
252 implies that truly viral regions may be discarded with existing tools and that sequences may be  
253 inadvertently classified as integrated proviruses.

254  
255 Finally, we compared the computational efficiency of CheckV to existing tools. Using 16 CPUs  
256 (Intel Xeon E5-2698 v3 processors), CheckV was 1.6× to 11.6× faster than the other programs  
257 when applied to the mock dataset and required ~2 GB of RAM. Using a single CPU CheckV was  
258 still faster than VirSorter and VIBRANT but slower compared to PhiSpy and Phigaro (Table S9).

## 260 **Using CheckV to identify high-quality genomes from metagenomes and viromes**

261  
262 To illustrate the type of results obtained with CheckV and its ability to scale to large datasets, we  
263 first applied it to the 735,106 contigs from the IMG/VR 2.0 database [37] (Table S10). The  
264 IMG/VR contigs were identified in assembled metagenomes using the Earth's Virome Protocol  
265 [5] using a minimum length cutoff of 5 kb. The original samples came from many studies, the  
266 majority of which did not use size filtration to enrich for extracellular viral particles. Because of  
267 the sample characteristics and detection approach, this dataset is mostly composed of  
268 environmental dsDNA phages and contains sequences from both lysogenic and lytic viruses.

269  
270 First, we used CheckV to identify three types of complete genomes from IMG/VR, including: DTR  
271 contigs (N=14,844), proviruses with 5' and 3' attachment sites (N=1,052), and contigs with  
272 inverted terminal repeats (ITRs; N=579). The longest DTR contig we identified was a 528,258 bp  
273 sequence from a saline lake in Antarctica estimated to be 100.0% complete and supported by  
274 paired end reads that connected contig ends. Based on gene content and phylogeny, this  
275 sequence is likely a member of one of the recently defined clades of "huge" phages [13]  
276 (Supplementary Text, Figure S5). To validate the other potentially complete genomes, we  
277 compared the contigs to CheckV's database of complete reference genomes based on AAI,  
278 estimated completeness (medium- and high-confidence estimates only), and identified high-  
279 quality assemblies (i.e. >90% complete). We found that 90.1% of the DTR contigs with estimated  
280 completeness met the high-quality standard, compared to only 58.2% of complete proviruses  
281 and 31.8% of ITRs. In the case of proviruses, lower estimated completeness may be due to their  
282 domestication and degradation in the host genome over time [38]. These results confirm that  
283 DTRs are a good indicator of complete viral genomes most of the time [15], but suggest that  
284 greater caution is needed when interpreting other signatures.

285  
286 Next, we used CheckV to estimate completeness for the entire IMG/VR dataset, including genome  
287 fragments. Using the accurate AAI-based approach, completeness could be estimated for 572,369  
288 IMG/VR contigs (78.6%) with high- or medium-confidence, including 82.8% from host-



289 associated, 82.0% from marine, 72.2% from freshwater, and 65.9% from soil environments. For  
290 the majority of these contigs, the best hit in the CheckV database was a DTR sequence  
291 (N=486,130, 84.9%) and was often derived from the same habitat as the IMG/VR contig (Figure  
292 S6). We next applied the HMM-based approach, which increased the percent of IMG/VR contigs  
293 with estimated completeness to 97.8%. The AAI- and HMM-based estimates of completeness  
294 were well correlated for IMG/VR contigs with both predictions (Spearman's  $\rho = 0.90$ ), but the  
295 HMM-based estimates were consistently lower (94.1% of contigs), which is expected given that  
296 this approach was designed to be more conservative.

297  
298 We next classified IMG/VR sequences into quality tiers according to their estimated  
299 completeness, revealing 1.9% complete, 2.5% high-, 6.5% medium-, and 86.9% low-quality  
300 sequences, with the remainder 2.2% with undetermined quality (Figure 4A). Contig sizes were  
301 strongly correlated with quality tiers, with complete genomes centered at 44 kb, which is  
302 consistent with genome sizes from the *Caudovirales* order (Figure 4B). Interestingly, aquatic  
303 samples, both marine and freshwater, seemed to contribute more partial genomes than other  
304 environments, which may reflect challenges in metagenomic assembly for these environments  
305 related to low sample biomass [39], high strain heterogeneity [40], or rare (i.e. low-coverage)  
306 viral populations. We also applied CheckV to the Global Ocean Virome (GOV) 2.0 dataset [6]  
307 (Table S11) revealing remarkably similar patterns (Figure S7). Like IMG/VR, the GOV dataset  
308 contains viral contigs that are at least 5 kb, but unlike IMG/VR, the original samples were from  
309 the open ocean and enriched for viral particles prior to sequencing.

### 310 311 **Using CheckV to discriminate viral-encoded functions from host contamination**

312  
313 Finally, we used CheckV to identify putative proviruses from the IMG/VR database that were  
314 flanked on one or both sides by host genes. Overall, only 5.2% of contigs followed this pattern  
315 (Figure 4C) with 97.1% of host regions occurring on only one side and typically representing a  
316 minor fraction of the contig's length (median=12.0%, Figure 4D). Proviruses were detected in all  
317 biomes, although more frequently in host-associated metagenomes. However, longer contigs  
318 were more likely to contain a host region (Figure 4D), which may be explained by higher  
319 sensitivity of CheckV for longer sequences (Figure S4) and a greater chance of intersecting a  
320 host-provirus boundary. Supporting these predictions, the majority of long proviruses (>50 kb  
321 with >20% contamination) were confirmed by either VirSorter or VIBRANT (617/805, 76.6%)  
322 and often contained integrases (686/805, 85.2%). We also used CheckV to identify proviruses in  
323 the GOV dataset, revealing similar patterns (Figure S7). Together, these results confirm that the  
324 majority of IMG/VR and GOV sequences are entirely viral or encode a short host-derived region.

325  
326 Notably, even a small amount of contamination by host-derived sequences can impair  
327 downstream analyses, especially ones related to the gene content and functional potential of  
328 uncultivated viruses [16]. To illustrate this potential issue, we functionally annotated IMG/VR  
329 proviruses using the KEGG database [41] and compared the functions of genes in host versus  
330 viral regions. Overall, host regions represented only 12.0% of the genes, but 42.3% of genes  
331 assigned to a KEGG metabolic pathway (Figure 4F). Many pathways were highly enriched in host  
332 genes, including those for biosynthesis of antibiotics and ABC transporters (Figure 4G and Table  
333 S12). For example, 625 genes from the IMG/VR database were annotated as multi-drug  
334 resistance efflux pumps, but 92.8% of these were found in host regions. In contrast, KEGG  
335 pathways for recombination, mismatch repair, and nucleotide biosynthesis were all enriched in  
336 viral regions. Without the detection of provirus boundaries provided by CheckV, it would not

337 have been possible to discriminate truly viral-encoded functions from host contamination except  
 338 through manual curation, which at the scale of IMG/VR's data size becomes virtually impossible.  
 339

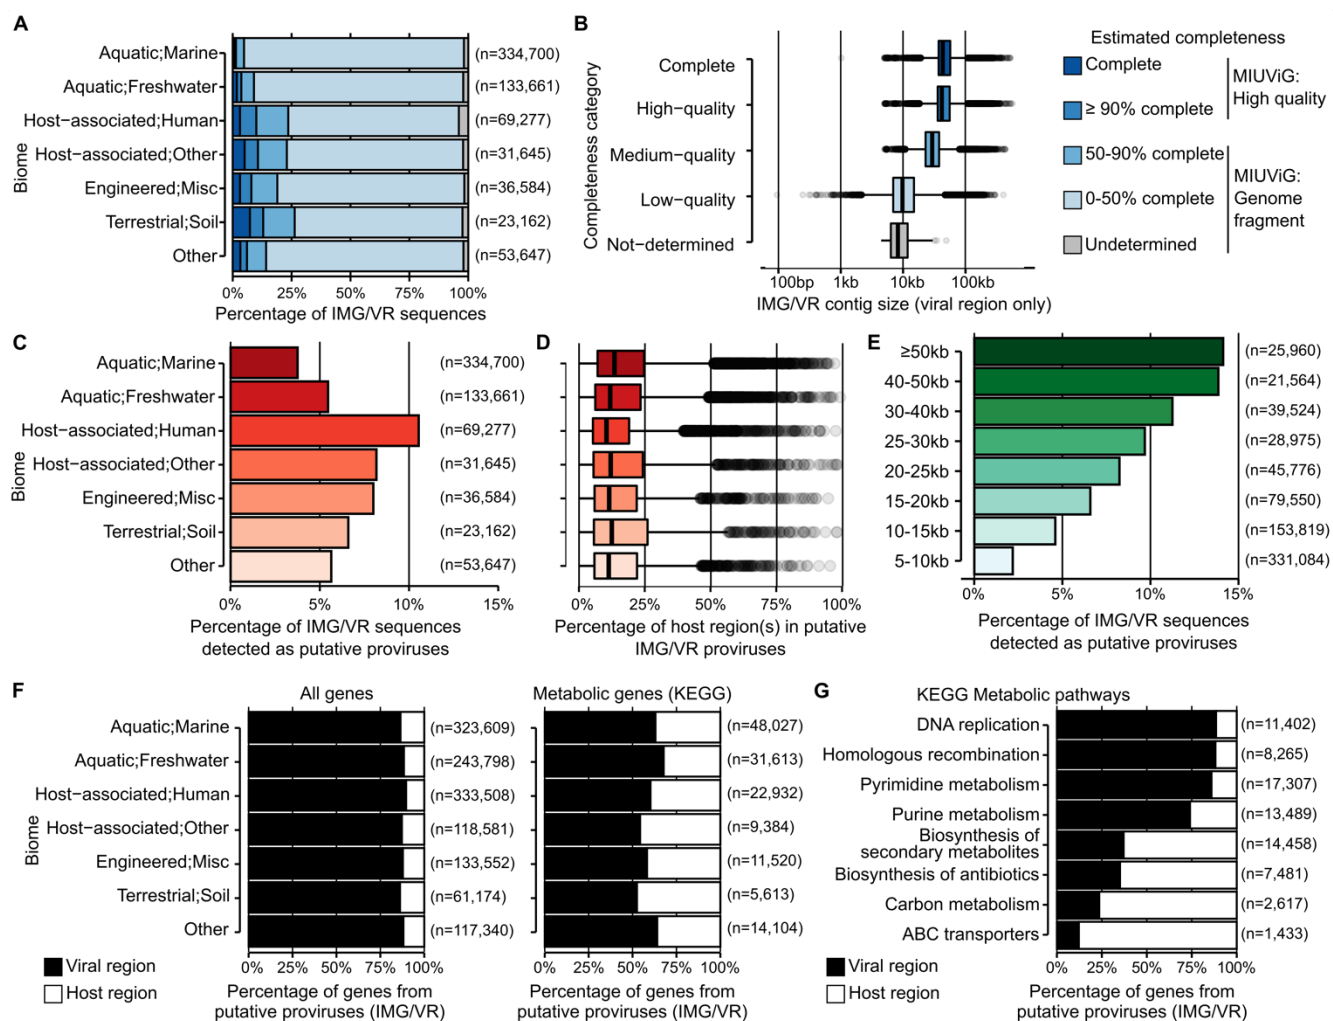

340  
 341  
 342 **Figure 4: Application of CheckV to the IMG/VR database.** A) Estimated completeness of IMG/VR contigs by  
 343 biome. B) Distribution of IMG/VR contig length across quality tiers. For proviruses, only the size of the predicted  
 344 viral region was considered. C) Proportion of IMG/VR contigs predicted as proviruses by biome. D) Length of the  
 345 predicted host region by biome for IMG/VR contigs predicted as proviruses. The region length is indicated as a  
 346 percentage of the total contig length. E) Proportion of contigs predicted as proviruses by contig length. F)  
 347 Percentage of all genes from predicted proviruses found in viral/host regions. G) Percentage of metabolic genes  
 348 from predicted proviruses found in viral/host regions. H) Percentage of genes from selected KEGG pathways for  
 349 predicted proviruses found in viral/host regions.

350

## 351 Discussion

352

353 Here we presented CheckV, an automated pipeline for assessing the quality of metagenome-  
 354 assembled viral genomes along with an expanded database of complete viral genomes we  
 355 systematically identified from environmental data sources. We anticipate CheckV will be broadly  
 356 useful in future viral metagenomics studies and for reporting quality statistics required in the  
 357 MIUViG checklist [17]. Estimation of completeness will be especially valuable to distinguish near-  
 358 complete genomes from short genome fragments, as these two types of sequences are associated

359 with different limitations and biases. Meanwhile, the removal of genes originating from the host  
360 genome will be critically important for reducing false positives in viral studies focusing on  
361 auxiliary metabolic genes or novel protein families. We also expect that CheckV's database of  
362 complete viral genomes will be a useful community resource that contains a wealth of untapped  
363 insights about novel viruses from diverse environments.

364  
365 While this first version of CheckV represents a major advance, several improvements may be  
366 possible in the future. First, it will be important to incorporate new viral genomes as they  
367 become available in order to continually expand the environmental and taxonomic diversity of  
368 the reference database. Second, metagenomic read mapping could be used to identify circular  
369 contigs, refine virus-host boundaries, and determine genome termini. Third, viral bins and  
370 segmented viral genomes, which are represented by multiple sequences, pose several additional  
371 challenges not addressed by the current version of CheckV. Finally, we largely focused on  
372 bacterial and archaeal viruses in our benchmarking and applications, so modifications may be  
373 necessary to extend CheckV for eukaryotic viruses, particularly those with segmented genomes  
374 or those that contain many metabolic genes.

375  
376

## 377 **Methods**

### 378 **Database of HMMs for classification of viral and microbial genes**

379  
380 We selected HMMs from existing databases that could be leveraged to classify genes as either  
381 viral or microbial with high specificity. First, 125,754 HMMs were downloaded from four databases:  
382 VOGDB (release 97, N=25,399, <http://vogdb.org>), IMG/VR (downloaded January 2020,  
383 N=25,281) [37], RVDB (release 17, N=9,911) [42], KEGG Orthology (October 02, 2019 release,  
384 N=22,746) [41], Pfam A (release 32, N=17,929) [43], Pfam B (release 27, N=20,000) [44], and  
385 TIGRFAM (release 15, N=4,488) [45]. Next, we used `hmmsearch v3.1b2` [46] to align the HMMs  
386 versus 1,590,764 proteins from 30,903 NCBI GenBank viral genomes (downloaded June 1, 2019)  
387 [28] and 5,749,148 proteins from 2,015 bacterial and 239 archaeal genomes from the Genome  
388 Taxonomy Database (GTDB; Release 89) [36]. For GTDB, one genome was selected per family  
389 and when multiple genomes were available, we chose the one with the highest CheckM quality  
390 score (completeness - 5 x contamination). Additionally, we ran VIBRANT v1.2.0 [11], VirSorter  
391 v.1.0.5 [10], and PhiSpy v.3.7.8 [20] using default parameters to identify and remove 590,484  
392 viral proteins identified on proviruses in the selected GTDB genomes.

393  
394  
395 Based on the `hmmsearch` results, we calculated the percentage of viral and microbial genes  
396 matching each HMM at bit-score cutoffs ranging from 25 to 1,000 in increments of 5. We then  
397 selected the lowest bit-score cutoff for each HMM that resulted in a >100-fold difference between  
398 the percentage of the total viral gene set and the percentage of the total microbial gene set  
399 matched by the HMM (i.e. bit-score cutoff for which the hits were either strongly enriched in  
400 viruses or microbial genes). To limit false positives, we excluded HMMs that were classified as  
401 microbial-specific but were derived from primarily viral databases (VOGDB, IMG/VR, RVDB) or  
402 contained viral terms (viral, virus, virion, provirus, capsid, terminase) for HMMs from other  
403 databases. Using this approach, 114,765 HMMs were identified as viral-specific or microbial-  
404 specific.

405

406 Next, we selected the maximally informative subset of HMMs to reduce the size of the database  
407 and limit CheckV computing time. First, we retained 44,415 HMMs with at least 20 viral hits or  
408 with at least 100 microbial hits after applying the bit-score cutoffs. Next, we calculated the  
409 Jaccard similarity between all pairs of HMMs based on each HMMs set of gene hits. For  
410 computational efficiency, we used the 'all\_pairs' function in the SetSimilaritySearch Python  
411 package (<https://github.com/ekzhu/SetSimilaritySearch>). Jaccard similarities were used as  
412 input for single-linkage clustering with a Jaccard similarity cutoff of 0.5, resulting in 15,958 non-  
413 redundant HMMs (8,773 viral-specific, 7,185 microbial-specific). To form the final database, we  
414 selected the HMM with the greatest number of gene hits from each cluster of HMMs.  
415

## 416 **Identification of virus-host boundaries**

417  
418 Given a viral contig, CheckV predicts host-virus boundaries in three stages. First, proteins are  
419 predicted using Prodigal v2.6.3 (option '-p' for metagenome mode) [47] and compared to the  
420 15,958 HMMs using hmmsearch. Each protein is classified as viral, microbial, or unannotated  
421 according to its top-scoring hit after applying the HMM-specific bit-score cutoffs. Additionally,  
422 the GC content of each gene is calculated. Second, CheckV evaluates each intergenic region as a  
423 potential boundary between a host and a viral region as follows. For each intergenic region, two  
424 windows of up to 40 genes are compared, one upstream and one downstream of the potential  
425 breakpoint. Windows can contain fewer than 40 genes only if they start or end at a contig  
426 boundary. For each window, viral-annotated genes are assigned a score of +1, microbial-  
427 annotated genes are assigned a score of -1, and a mean viral score,  $V$ , across the window is  
428 calculated, ignoring unannotated genes. Then, CheckV computes a breakpoint score,  $S$ , based on  
429 the absolute difference in the mean viral score,  $V$ , and average GC content,  $G$ , between upstream  
430 (5') and downstream (3') windows:  $S = |V_{5'} - V_{3'}| + 0.02 * |G_{5'} - G_{3'}|$ . The value of  $S$  ranges  
431 from 0 to 4, given that  $|V_{5'} - V_{3'}|$  and  $0.02 * |G_{5'} - G_{3'}|$  both range from 0.0 to 2.0. CheckV also  
432 stores the orientation of each breakpoint (i.e. host-virus or virus-host) based on the values of  $V_{5'}$ ,  
433 and  $V_{3'}$ . These scores are computed at each intergenic position, moving from the 5' end to the 3'  
434 end of a contig. CheckV then identifies significant breakpoints having scores  $\geq 1.2$ ,  $\geq 30\%$  of  
435 genes annotated as microbial in either window, and a total of 4 annotated genes between  
436 windows. After these filters, CheckV groups together adjacent breakpoints with the same  
437 orientation and, for each group, chooses the breakpoint with the highest score. The algorithm  
438 parameters were fine-tuned empirically based on a dataset of mock proviruses and sequences  
439 from the IMG/VR database.  
440

## 441 **AAI-based estimation of genome completeness**

442  
443 Given a viral contig, CheckV estimates genome completeness in four stages. First, CheckV  
444 performs an amino acid alignment of Prodigal-predicted protein coding genes from the contig  
445 against the database of reference genomes using DIAMOND [48] with options '--evaluate 1e-5 --  
446 query-cover 50 --subject-cover 50 -k 10000'. Based on these alignments, the following metrics  
447 are computed for the viral contig versus each reference genome: average amino acid identity  
448 (AAI): length-weighted average identity across aligned proteins, alignment fraction (AF): the  
449 percent of amino acids aligned from the query sequence, and alignment score: AAI multiplied by  
450 AF. Second, CheckV identifies the top hit in the database for the contig (i.e. reference genome  
451 with the highest alignment score) and all reference genomes with alignment scores that are  
452 within 50% of the top hit. The expected genome length of the viral contig,  $\hat{G}$ , is then estimated by  
453 taking a weighted average of the genome sizes of matched reference genomes, where the

454 alignment scores are used as weights. Reference genome lengths are further weighted based on  
455 their source: 2.0 for isolate viruses and 1.0 for metagenome-derived viruses, which are more  
456 likely to contain assembly errors and artifacts. CheckV also reports the confidence level of this  
457 estimate (low, medium, high), which is determined based on the length of the viral contig and the  
458 alignment score to the top reference genome. (See below for more details on how confidence  
459 levels are estimated). Third, CheckV estimates the genome completeness of each viral contig,  $\hat{C}$ ,  
460 using the formula:  $\hat{C} = 100 * L / \hat{G}$ , where  $L$  is the length of the viral region for proviruses, or  
461 the contig length otherwise.

462

### 463 **HMM-based estimation of genome completeness**

464

465 An HMM-based approach was developed to estimate completeness for novel viruses that are too  
466 diverged from CheckV genomes to obtain an AAI-based estimate. First, CheckV identifies viral  
467 genes on the contig based on comparison to the 8,773 viral HMMs (as described in 'Identification  
468 of virus-host boundaries'). Each HMM is associated with one or more reference genome lengths  
469 (based on CheckV references where the HMM is found) and the coefficient of variation (CV) is  
470 computed, in order to prioritize HMMs with low genome length variability. For each contig,  
471 CheckV identifies the viral HMM with the lowest CV that is associated with at least 10 reference  
472 genomes. Next, the program compares the contig length to the distribution of genome lengths  
473 represented by the selected HMM and chooses the level of completeness (0-100%) that would  
474 place the contig in the upper 5th percentile of the genome length distribution. Thus, the  
475 approach is designed to estimate the maximum level of genome completeness that can be  
476 ascertained with at least 95% probability.

477

### 478 **Confidence levels for AAI-based completeness estimates**

479

480 We conducted a large-scale benchmarking experiment to derive confidence levels for AAI-based  
481 completeness estimation. First, we extracted a random fragment from each of CheckV's reference  
482 genomes to simulate metagenomic contigs of varying length (200 bp, 500 bp, 1 kb, 2 kb, 5 kb, 10  
483 kb, 20 kb, and 50 kb). Next, we used CheckV to compute the alignment score between each contig  
484 and each complete genome in the reference database. We then compared the true genome length  
485 of each contig (i.e. the length before fragmentation),  $L$ , to the estimated genome length based on  
486 each matched reference genome,  $\hat{L}$ , and computed the relative unsigned error, as  $100 * |L - \hat{L}| / \hat{L}$ . We then computed the median relative unsigned error after grouping the estimates  
487 based on their alignment score and contig length. Finally, we determined three confidence levels:  
488 high confidence (0-5% median unsigned error, 76.6% mean AAI, 65.0% mean AF); medium  
489 confidence (5-10% median unsigned error, 51.8% mean AAI, 54.7% mean AF); low confidence  
490 (>10% median unsigned error, 47.5% mean AAI, 36.6% mean AF. Using this information, CheckV  
491 reports a confidence level in the estimated completeness value for each input contig based on the  
492 contig length and alignment score (i.e. combination of AAI and AF) to the top database hit. By  
493 default, only medium- and high-confidence estimates are included in the final report.

494

### 495 **Database of complete viral genomes for AAI-based completeness estimation**

496

497 We downloaded 30,903 genomes from NCBI GenBank on June 1, 2019. 1,937 genomes were  
498 excluded that were indicated as 'partial', 'chimeric', or 'contaminated'. Of the 28,966 that  
499

500 remained, 677 (2.3%) were labeled as 'metagenomic' or 'environmental', indicating the vast  
501 majority are derived from cultivated isolates.

502

503 Next, we used CheckV to systematically search for complete genomes of uncultivated viruses  
504 from publicly available and previously assembled metagenomes, metatranscriptomes, and  
505 metaviromes. An assembled contig was considered complete if it was at least 2,000 bp long and  
506 included a direct terminal repeat (DTR) of at least 20 bp (DTR contigs). We searched for DTR  
507 contigs in the following datasets: 19,483 metagenomes and metatranscriptomes from IMG/M  
508 (accessed on September 2019) [29], 11,752 metagenomes from MGnify (accessed on April 16,  
509 2019) [30], 9,428 metagenomes assembled by Pasolli et al. [32], an expanded collection of 4,763  
510 metagenomes from the HGM dataset [31], 1,831 viromes from the HuVirDB [33], and 145  
511 viromes from the global ocean [6].

512

513 From this initial search, we identified a total of 751,567 DTR contigs. To minimize false positives  
514 and other artifacts, we removed the following: (1) 45,448 contigs with low complexity repeats  
515 (e.g. AAAAA...), as determined by dustmasker from the BLAST+ package v2.9.0 [49], (2) 11,359  
516 contigs classified as a provirus by CheckV (e.g. flanked by host region), (3) 5,737 contigs with  
517 repetitive repeats occurring more than 5 times per contig, which could represent repetitive  
518 genetic elements like CRISPR arrays, (4) 6,543 contigs that contained a large duplicated region  
519 spanning  $\geq 20\%$  of the contig length which results from the rare instances where assemblers  
520 concatenate multiple copies of the same genome, and (5) 1,293 contigs containing  $\geq 1\%$   
521 ambiguous base calls. After these filters, 686,030 contigs remained (91.3% of total).

522

523 Next, we used a combination of CheckV marker genes and VirFinder [9] to classify 116,666 DTR  
524 contigs as viral. First, the DTR contigs were used as input to VirFinder v1.1 with default  
525 parameters and to CheckV to identify viral and microbial marker genes. We additionally  
526 searched for genes related to plasmids and other non-viral mobile genetic elements using a  
527 database of 141 HMMs from recent publications [50-52]. A contig was classified as viral if the  
528 number of viral genes exceeded number of microbial and plasmid genes ( $N=99,345$ ), or  
529 VirFinder reported a p-value  $< 0.01$  with no plasmid genes and  $\leq 1$  microbial gene ( $N=36,084$ ).

530

### 531 **Taxonomic annotation of CheckV reference genomes**

532

533 Annotations were determined based on HMM searches against a custom database of 1,000  
534 taxonomically informative HMMs from the VOG database. These HMMs were selected for major  
535 bacterial and archaeal viral groups with consistent genome length and at least 10 representative  
536 genomes, including: *Caudovirales*, CRESS-DNA and *Parvoviridae*, *Autolykiviridae*, *Fusello-* and  
537 *Guttaviridae*, *Inoviridae*, *Ligamenvirales Ampulla-* *Bicauda-* and *Turriviridae*, *Microviridae*, and  
538 *Riboviria*. For each group, VOGs found in  $\geq 10\%$  of the group members and never detected  
539 outside of this group were considered as marker genes. All CheckV reference genomes were  
540 annotated based on the clade with the most HMM hits. Overall, 96.4% of HMM hits were to a  
541 single viral taxon.

542

### 543 **Validating the completeness of CheckV reference genomes**

544

545 Next, we validated the completeness for all GenBank genomes and DTR contigs. First, we used  
546 CheckV to estimate the completeness for all sequences after excluding self matches. This was  
547 performed using a database of just GenBank sequences and another of just DTR contigs. Any

548 sequence with <90% estimated completeness using either database was excluded (medium- and  
549 high-confidence estimates only). Second, we compared the genome length to the known  
550 distribution of genome lengths for the annotated viral taxon (e.g. *Microviridae*). Any genome  
551 considered an outlier or shorter than the shortest reference genome for the annotated clade was  
552 excluded. After these filters, we then selected genomes with  $\geq 90\%$  estimated completeness  
553 using either database (medium- and high-confidence estimates only) or longer than 30 kb  
554 without a completeness estimate. These selection criteria were chosen to minimize the number  
555 of false positives (i.e. genome fragments wrongly considered complete genomes) at the cost of  
556 some false negatives (i.e. removing truly complete genomes). This resulted in 24,834 GenBank  
557 genomes and 76,262 DTR contigs that were used to form the final CheckV genome database.

## 558 559 **Generating a non-redundant set of CheckV reference genomes**

560  
561 Average nucleotide identity (ANI) and the alignment fraction (AF) were computed between the  
562 24,834 GenBank genomes and 76,262 DTR contigs using a custom script. Specifically, we used  
563 blastn from the blast+ package v.2.9.0 (options: perc\_identity=90 max\_target\_seqs=10000) to  
564 generate local alignments between all pairs of genomes. Based on this, we estimated ANI as the  
565 average DNA identity across alignments after weighting the alignments by their length. The  
566 alignment fraction (AF) was computed by taking the total length of merged alignment  
567 coordinates and dividing by the length of each genome. Clustering was then performed using a  
568 greedy, centroid-based algorithm in which (1) genomes were sorted by length, (2) the longest  
569 genome was designated as the centroid of a new cluster, (3) all genomes within 95% ANI and  
570 85% AF were assigned to that cluster, and steps (2-3) were repeated until all genomes had been  
571 assigned to a cluster, resulting in 52,141 non-redundant genomes.

## 572 573 **Benchmarking CheckV and comparison to existing tools**

574  
575 To benchmark CheckV's detection of host regions, we constructed a mock dataset of proviruses.  
576 382 viral genomes were downloaded from NCBI GenBank (after June 1, 2019) and paired with  
577 76 GTDB genomes (71 from bacterial 5 from archaea). The pairing was performed at the genus  
578 level based on the annotated name of the virus and host (e.g. *Escherichia* phage paired with  
579 *Escherichia* bacterial genome). When multiple GTDB genomes were available for a given bacterial  
580 genus, we selected the one with the highest CheckM quality score, and we selected a maximum of  
581 10 GenBank genomes per bacterial genus to reduce the influence of a few overrepresented  
582 groups. Any GenBank or GTDB genome that was used at any stage for training CheckV was  
583 excluded. Proviruses were simulated at varying contig lengths (5, 10, 20, 50, 100 kb) with  
584 varying levels of host contamination (10, 20, 50%; defined as the % of the contig length derived  
585 from the microbial genome). Microbial genome fragments were appended to either the 5' or 3'  
586 end of the viral fragment at random. As a negative control, we also simulated contigs that were  
587 entirely viral (i.e. no flanking microbial region) at the same contig lengths.

588  
589 Mock proviruses were used as input to CheckV using default parameters. For comparison, we  
590 also ran VIBRANT v1.2.0 [11], VirSorter v.1.0.5 [10], PhiSpy v.3.7.8 [20], and Phigaro v0.1.5.0  
591 [21]. All tools were run with default options, with the exception of VIBRANT and VirSorter, which  
592 were run with the '--virome' flag to increase sensitivity. Nucleotide sequences were used as input  
593 to all tools, except Phispy, for which we first ran Prokka v1.14.5 [53] to generate the required  
594 input file. A contig was classified as a provirus if it contained a predicted viral region that  
595 covered <95% of its length. Each prediction was then classified as a true positive (TP; provirus

596 classified as provirus), false positive (FP; viral contig classified as provirus), true negative (TN;  
597 viral contig not classified as provirus), and false negative (FN; provirus classified as provirus).  
598 For the TPs, we also compared the true length of the host region to the predicted length.

599  
600 We used the same 382 provirus genomes to benchmark CheckV's completeness estimation. For  
601 each of the 382 genomes, we extracted 10 contigs at a random start position and with a  
602 completeness value between 1% and 100%. The completeness of all contigs was estimated using  
603 CheckV with default parameters. VIBRANT v1.2.0 was also run using default parameters to  
604 assign contigs to quality tiers.

## 605 606 **Application of CheckV to the IMG/VR and GOV datasets**

607  
608 We downloaded 735,106 contigs longer than 5 kb from IMG/VR 2.0 [37], after excluding viral  
609 genomes from cultivated isolates and proviruses identified from microbial genomes. We also  
610 downloaded 488,131 contigs longer than 5 kb or circular from the Global Ocean Virome (GOV)  
611 2.0 dataset [6] ([datacommons.cyverse.org/browse/iplant/home/shared/iVirus/GOV2.0](https://datacommons.cyverse.org/browse/iplant/home/shared/iVirus/GOV2.0)). These  
612 were used as input to CheckV to estimate the completeness, identify host-virus boundaries, and  
613 predict closed genomes. When running the completeness module, we excluded perfect matches  
614 (100% AAI and 100% AF) to prevent any DTR contig from matching itself in the database (since  
615 IMG/VR 2.0 and GOV 2.0 were used as data sources to form the CheckV database). A Circos plot  
616 [54] was used to link IMG/VR contigs to their top matches in CheckV database. Protein coding  
617 genes were predicted from proviruses using Prodigal and compared to HMMs from KEGG  
618 Orthology (October 02, 2019 release) using hmmsearch from the HMMER package v3.1b2 (e-  
619 value  $\leq 1e-5$  and score  $\geq 30$ ). Pfam domains with the keyword “integrase” and “recombinase”  
620 were also identified across all proviruses.

621  
622 The largest DTR contig we identified from IMG/VR and included in the CheckV database was  
623 further annotated to illustrate the type of virus and genome organization represented (IMG ID =  
624 3300025697\_\_\_Ga0208769\_1000001). CDS prediction and functional annotations were  
625 obtained from IMG [29]. Annotation for provirus hallmark genes including a terminase large  
626 subunit (TerL) and major capsid protein were confirmed via HHPred [55] (databases included  
627 PDB 70\_8, SCOPe70 2.07, Pfam-A 32.0, and CDD 3.18, score > 98). A circular genome map was  
628 drawn with CGView [56]. To place this contig in an evolutionary context, we built a TerL  
629 phylogeny including the most closely related sequences from a global search for large phages  
630 [13]. The TerL amino acid sequence from the DTR contig was compared to all TerL sequences  
631 from the “huge proviruses” dataset via blastp (e-value  $\leq 1e-05$  and score  $\geq 50$ ) to identify the 30  
632 most similar sequences (sorted based on blastp bit-score). These reference sequences and  
633 3300025697\_\_\_Ga0208769\_1000001 were aligned with MAFFT v7.407 [57] using default  
634 parameters, the alignment automatically cleaned with trimAL v1.4.rev15 with the --gappyout  
635 option [58], and a phylogeny built with IQ-Tree v1.5.5 with built-in model selection (optimal  
636 model suggested: LG+R4) [59]. The resulting tree was visualized with iTOL [60].

## 637 638 **Data and code availability**

639  
640 CheckV is written in Python and is freely available as open source software at  
641 <https://bitbucket.org/berkeleylab/CheckV> under a BSD license. CheckV quality statistics and



642 listing of complete viral genomes from IMG/VR will be available in the next version scheduled for  
643 release on September 2020.  
644

## 645 **Acknowledgements**

646  
647 We thank Professor Riccardo Cavicchioli for providing additional information on the sample  
648 from which the largest DTR contig was assembled. The work conducted by the U.S. Department  
649 of Energy Joint Genome Institute is supported by the Office of Science of the U.S. Department of  
650 Energy under contract no. DE-AC02-05CH11231. This work was also supported the grant  
651 #2016/23218-0 from São Paulo Research Foundation (FAPESP). A.P.C. received a scholarship  
652 #2018/04240-0 from FAPESP.  
653

## 654 **Author information**

### 655 **Affiliations**

656  
657 *U. S. Department of Energy Joint Genome Institute, Berkeley, California, USA*  
658 Stephen Nayfach, Simon Roux, Emiley Eloë-Fadrosh, Nikos Kyrpides  
659

660  
661 *Department of Genetics, Evolution, Microbiology and Immunology, Institute of Biology, University of*  
662 *Campinas, Brazil*  
663 Antonio Pedro Camargo  
664

### 665 **Contributions**

666  
667 S.N. and S.R. conceived of the project. S.N. and S.R. performed experiments and analyzed data. S.N.  
668 built databases and designed algorithms. S.N. and A.P.C. wrote the code. A.P.C. packaged the  
669 software. S.N. and S.R. drafted the manuscript with feedback from A.P.C, E.E.F., and N.K. N.K.  
670 supervised the project. All authors reviewed and approved the manuscript.  
671

### 672 **Corresponding authors**

673  
674 Correspondence to Stephen Nayfach (snayfach@lbl.gov) or Nikos C. Kyrpides  
675 (nckyrpides@lbl.gov).  
676

### 677 **Competing interests**

678  
679 The authors declare no competing interests.  
680

## 681 **References**

- 682  
683 1. Koonin, E.V., et al., *Global Organization and Proposed Megataxonomy of the Virus World*.  
684 *Microbiol Mol Biol Rev*, 2020. **84**(2).  
685 2. Shkoporov, A.N. and C. Hill, *Bacteriophages of the Human Gut: The "Known Unknown" of*  
686 *the Microbiome*. *Cell Host Microbe*, 2019. **25**(2): p. 195-209.

- 687 3. Williamson, K.E., et al., *Viruses in Soil Ecosystems: An Unknown Quantity Within an*  
688 *Unexplored Territory*. *Annu Rev Virol*, 2017. **4**(1): p. 201-219.
- 689 4. Breitbart, M., et al., *Phage puppet masters of the marine microbial realm*. *Nat Microbiol*,  
690 2018. **3**(7): p. 754-766.
- 691 5. Paez-Espino, D., et al., *Uncovering Earth's virome*. *Nature*, 2016. **536**(7617): p. 425-30.
- 692 6. Gregory, A.C., et al., *Marine DNA Viral Macro- and Microdiversity from Pole to Pole*. *Cell*,  
693 2019. **177**(5): p. 1109-1123 e14.
- 694 7. Gregory, A.C., et al., *The human gut virome database*. *bioRxiv*, 2019.
- 695 8. Emerson, J.B., et al., *Host-linked soil viral ecology along a permafrost thaw gradient*. *Nat*  
696 *Microbiol*, 2018. **3**(8): p. 870-880.
- 697 9. Ren, J., et al., *VirFinder: a novel k-mer based tool for identifying viral sequences from*  
698 *assembled metagenomic data*. *Microbiome*, 2017. **5**(1): p. 69.
- 699 10. Roux, S., et al., *VirSorter: mining viral signal from microbial genomic data*. *PeerJ*, 2015. **3**: p.  
700 e985.
- 701 11. Kieft, K., Z. Zhou, and K. Anantharaman, *VIBRANT: Automated recovery, annotation and*  
702 *curation of microbial viruses, and evaluation of virome function from genomic sequences*.  
703 *bioRxiv*, 2019.
- 704 12. Philippe, N., et al., *Pandoraviruses: amoeba viruses with genomes up to 2.5 Mb reaching that*  
705 *of parasitic eukaryotes*. *Science*, 2013. **341**(6143): p. 281-6.
- 706 13. Al-Shayeb, B., et al., *Clades of huge phages from across Earth's ecosystems*. *Nature*, 2020.  
707 **578**(7795): p. 425-431.
- 708 14. Smits, S.L., et al., *Assembly of viral genomes from metagenomes*. *Front Microbiol*, 2014. **5**: p.  
709 714.
- 710 15. Roux, S., et al., *Minimum Information about an Uncultivated Virus Genome (MIUViG)*. *Nat*  
711 *Biotechnol*, 2019. **37**(1): p. 29-37.
- 712 16. Roux, S., et al., *Assessment of viral community functional potential from viral metagenomes*  
713 *may be hampered by contamination with cellular sequences*. *Open Biol*, 2013. **3**(12): p.  
714 130160.
- 715 17. Parks, D.H., et al., *CheckM: assessing the quality of microbial genomes recovered from*  
716 *isolates, single cells, and metagenomes*. *Genome Res*, 2015. **25**(7): p. 1043-55.
- 717 18. Belyi, V.A., A.J. Levine, and A.M. Skalka, *Sequences from ancestral single-stranded DNA*  
718 *viruses in vertebrate genomes: the parvoviridae and circoviridae are more than 40 to 50*  
719 *million years old*. *J Virol*, 2010. **84**(23): p. 12458-62.
- 720 19. Chung, C.H., et al., *Predicting genome terminus sequences of Bacillus cereus-group*  
721 *bacteriophage using next generation sequencing data*. *BMC Genomics*, 2017. **18**(1): p. 350.
- 722 20. Akhter, S., R.K. Aziz, and R.A. Edwards, *PhiSpy: a novel algorithm for finding prophages in*  
723 *bacterial genomes that combines similarity- and composition-based strategies*. *Nucleic*  
724 *Acids Res*, 2012. **40**(16): p. e126.
- 725 21. Starikova, E.V., et al., *Phigaro: high throughput prophage sequence annotation*. 2019.
- 726 22. Hindmarsh, P. and J. Leis, *Retroviral DNA integration*. *Microbiol Mol Biol Rev*, 1999. **63**(4):  
727 p. 836-43, table of contents.
- 728 23. Tisza, M.J., et al., *Discovery of several thousand highly diverse circular DNA viruses*. *Elife*,  
729 2020. **9**.
- 730 24. Casjens, S.R. and E.B. Gilcrease, *Determining DNA packaging strategy by analysis of the*  
731 *termini of the chromosomes in tailed-bacteriophage virions*. *Methods Mol Biol*, 2009. **502**:  
732 p. 91-111.
- 733 25. Munoz-Lopez, M. and J.L. Garcia-Perez, *DNA transposons: nature and applications in*  
734 *genomics*. *Curr Genomics*, 2010. **11**(2): p. 115-28.

- 735 26. Yan, Z., et al., *Inverted terminal repeat sequences are important for intermolecular*  
736 *recombination and circularization of adeno-associated virus genomes.* J Virol, 2005. **79**(1):  
737 p. 364-79.
- 738 27. Savilahti, H. and D.H. Bamford, *Linear DNA replication: inverted terminal repeats of five*  
739 *closely related Escherichia coli bacteriophages.* Gene, 1986. **49**(2): p. 199-205.
- 740 28. Sayers, E.W., et al., *GenBank.* Nucleic Acids Res, 2020. **48**(D1): p. D84-D86.
- 741 29. Chen, I.A., et al., *IMG/M v.5.0: an integrated data management and comparative analysis*  
742 *system for microbial genomes and microbiomes.* Nucleic Acids Res, 2019. **47**(D1): p. D666-  
743 D677.
- 744 30. Mitchell, A.L., et al., *MGNify: the microbiome analysis resource in 2020.* Nucleic Acids Res,  
745 2020. **48**(D1): p. D570-D578.
- 746 31. Nayfach, S., et al., *New insights from uncultivated genomes of the global human gut*  
747 *microbiome.* Nature, 2019. **568**(7753): p. 505-510.
- 748 32. Pasolli, E., et al., *Extensive Unexplored Human Microbiome Diversity Revealed by Over*  
749 *150,000 Genomes from Metagenomes Spanning Age, Geography, and Lifestyle.* Cell, 2019.  
750 **176**(3): p. 649-662 e20.
- 751 33. Soto-Perez, P., et al., *CRISPR-Cas System of a Prevalent Human Gut Bacterium Reveals*  
752 *Hyper-targeting against Phages in a Human Virome Catalog.* Cell Host Microbe, 2019.  
753 **26**(3): p. 325-335 e5.
- 754 34. Mukherjee, S., et al., *Genomes OnLine database (GOLD) v.7: updates and new features.*  
755 Nucleic Acids Res, 2019. **47**(D1): p. D649-D659.
- 756 35. Mauri, M., et al., *RAWGraphs*, in *Proceedings of the 12th Biannual Conference on Italian*  
757 *SIGCHI Chapter - CHItaly '17.* 2017. p. 1-5.
- 758 36. Parks, D.H., et al., *A standardized bacterial taxonomy based on genome phylogeny*  
759 *substantially revises the tree of life.* Nat Biotechnol, 2018.
- 760 37. Paez-Espino, D., et al., *IMG/VR v.2.0: an integrated data management and analysis system*  
761 *for cultivated and environmental viral genomes.* Nucleic Acids Res, 2019. **47**(D1): p. D678-  
762 D686.
- 763 38. Bobay, L.M., M. Touchon, and E.P. Rocha, *Pervasive domestication of defective prophages by*  
764 *bacteria.* Proc Natl Acad Sci U S A, 2014. **111**(33): p. 12127-32.
- 765 39. Rinke, C., et al., *Validation of picogram- and femtogram-input DNA libraries for microscale*  
766 *metagenomics.* PeerJ, 2016. **4**: p. e2486.
- 767 40. Warwick-Dugdale, J., et al., *Long-read viral metagenomics captures abundant and*  
768 *microdiverse viral populations and their niche-defining genomic islands.* PeerJ, 2019. **7**: p.  
769 e6800.
- 770 41. Kanehisa, M. and S. Goto, *KEGG: Kyoto Encyclopedia of Genes and Genomes.* Nucleic Acids  
771 Research, 2000. **28**(1): p. 27-30.
- 772 42. Goodacre, N., et al., *A Reference Viral Database (RVDB) To Enhance Bioinformatics Analysis*  
773 *of High-Throughput Sequencing for Novel Virus Detection.* mSphere, 2018. **3**(2).
- 774 43. El-Gebali, S., et al., *The Pfam protein families database in 2019.* Nucleic Acids Res, 2019.  
775 **47**(D1): p. D427-D432.
- 776 44. Finn, R.D., et al., *The Pfam protein families database.* Nucleic Acids Res, 2010. **38**(Database  
777 issue): p. D211-22.
- 778 45. Haft, D.H., et al., *TIGRFAMs and Genome Properties in 2013.* Nucleic Acids Res, 2013.  
779 **41**(Database issue): p. D387-95.
- 780 46. Eddy, S.R., *Accelerated Profile HMM Searches.* PLoS Comput Biol, 2011. **7**(10): p.  
781 e1002195.

- 782 47. Hyatt, D., et al., *Gene and translation initiation site prediction in metagenomic sequences*.  
783 *Bioinformatics*, 2012. **28**(17): p. 2223-30.
- 784 48. Buchfink, B., C. Xie, and D.H. Huson, *Fast and sensitive protein alignment using DIAMOND*.  
785 *Nat Methods*, 2015. **12**(1): p. 59-60.
- 786 49. Camacho, C., et al., *BLAST+: architecture and applications*. *BMC Bioinformatics*, 2009. **10**:  
787 p. 421.
- 788 50. Jorgensen, T.S., et al., *Hundreds of circular novel plasmids and DNA elements identified in a*  
789 *rat cecum metamobilome*. *PLoS One*, 2014. **9**(2): p. e87924.
- 790 51. Martini, M.C., et al., *Genomics of high molecular weight plasmids isolated from an on-farm*  
791 *biopurification system*. *Sci Rep*, 2016. **6**: p. 28284.
- 792 52. Jorgensen, T.S., et al., *Plasmids, Viruses, And Other Circular Elements In Rat Gut*. *bioRxiv*,  
793 2017.
- 794 53. Seemann, T., *Prokka: rapid prokaryotic genome annotation*. *Bioinformatics*, 2014. **30**(14):  
795 p. 2068-9.
- 796 54. Krzywinski, M., et al., *Circos: an information aesthetic for comparative genomics*. *Genome*  
797 *Res*, 2009. **19**(9): p. 1639-45.
- 798 55. Zimmermann, L., et al., *A Completely Reimplemented MPI Bioinformatics Toolkit with a New*  
799 *HHpred Server at its Core*. *J Mol Biol*, 2018. **430**(15): p. 2237-2243.
- 800 56. Stothard, P. and D.S. Wishart, *Circular genome visualization and exploration using CGView*.  
801 *Bioinformatics*, 2005. **21**(4): p. 537-9.
- 802 57. Katoh, K. and D.M. Standley, *MAFFT multiple sequence alignment software version 7:*  
803 *improvements in performance and usability*. *Mol Biol Evol*, 2013. **30**(4): p. 772-80.
- 804 58. Capella-Gutierrez, S., J.M. Silla-Martinez, and T. Gabaldon, *trimAl: a tool for automated*  
805 *alignment trimming in large-scale phylogenetic analyses*. *Bioinformatics*, 2009. **25**(15): p.  
806 1972-3.
- 807 59. Nguyen, L.T., et al., *IQ-TREE: a fast and effective stochastic algorithm for estimating*  
808 *maximum-likelihood phylogenies*. *Mol Biol Evol*, 2015. **32**(1): p. 268-74.
- 809 60. Letunic, I. and P. Bork, *Interactive Tree Of Life (iTOL) v4: recent updates and new*  
810 *developments*. *Nucleic Acids Res*, 2019. **47**(W1): p. W256-W259.  
811
