# Supplementary material for: CheckV: assessing the quality of metagenome-assembled viral genomes
Source: bioRxiv or medRxiv preprint supplement (doi:10.1101/2020.05.06.081778), 2020-05-08
Supplement: Supplementary file [file media-1.pdf]

1 **Supplementary figures**

2  
3

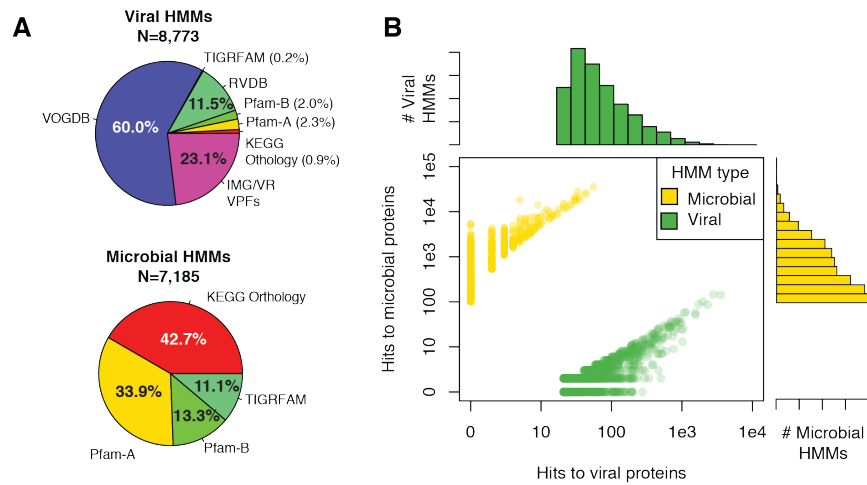

4  
5  
6 **Figure S1. CheckV's database of viral- and microbial-specific HMMs.** A) Non-redundant  
7 viral and microbial HMMs were selected from seven reference databases. B) The  
8 distribution of the number of hits to viral and microbial proteins for the CheckV HMMs  
9 shown in A.

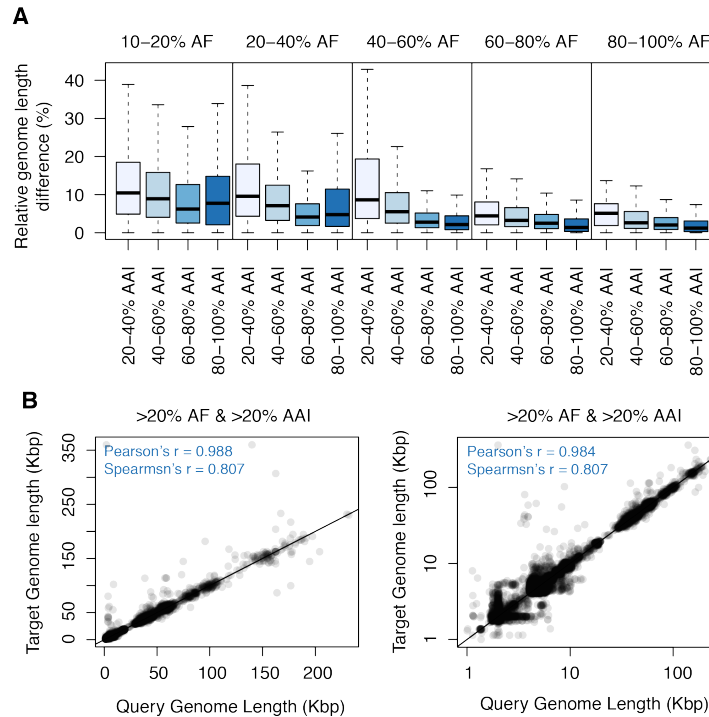

10  
11 **Figure S2. Variation in genome size between related viruses.** The relatedness between  
12 all CheckV reference genomes was estimated based on their average amino acid identity  
13 (AAI) and alignment fraction (AF). A) The relative difference in genome length for viruses  
14 with varying degrees of relatedness. B) Scatterplots showing genome sizes for related  
15 viruses. The right panel shows genome sizes on a log10 scale.

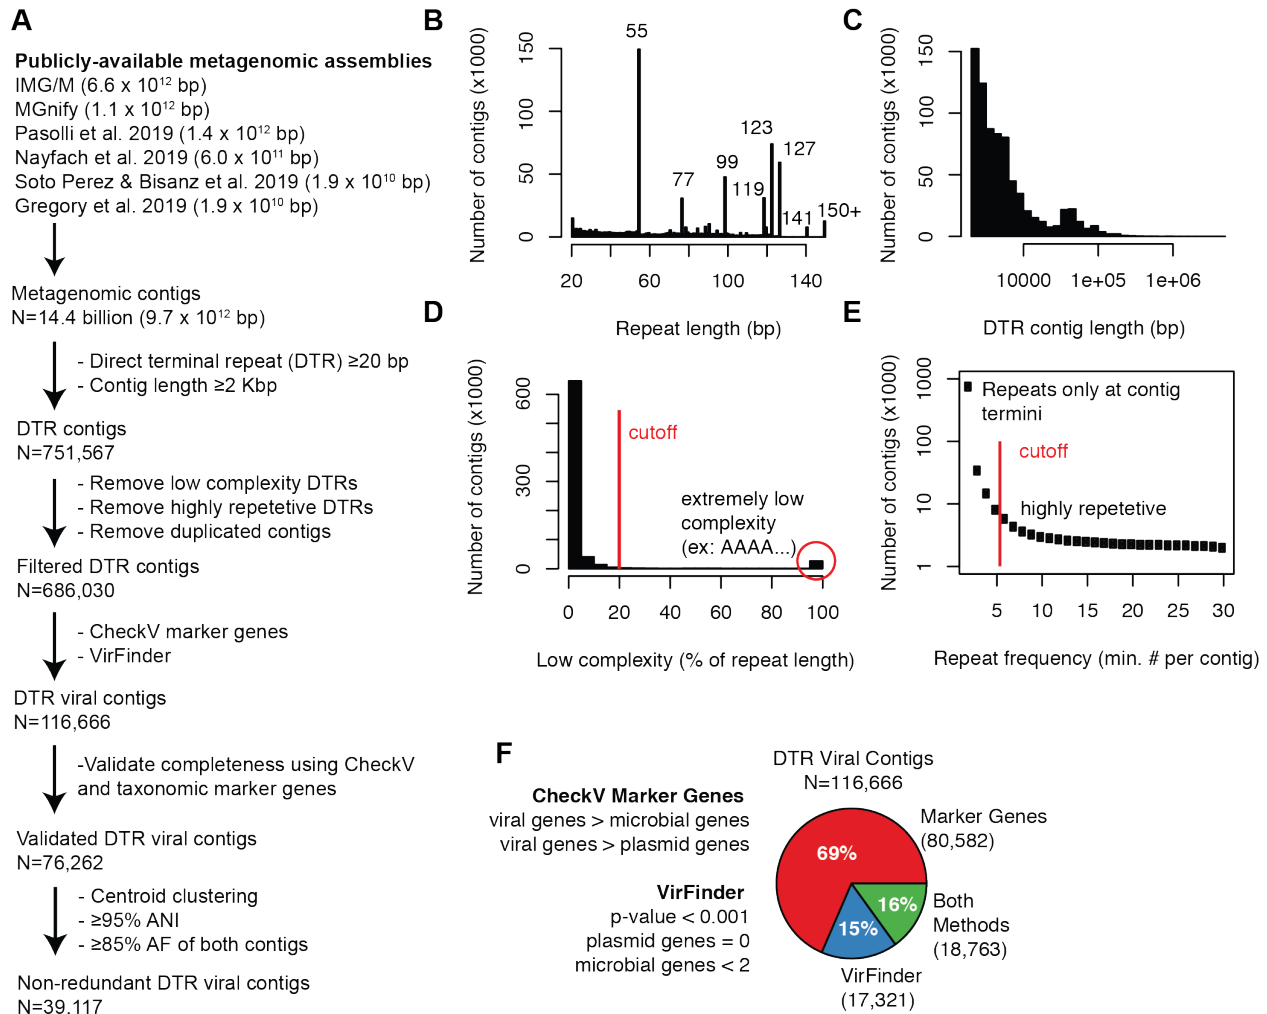

16  
17

18 **Figure S3. Identification of viral DTR contigs.** A) Publicly available metagenomes were  
 19 systematically mined for 76,262 DTR viral contigs, resulting in 39,117 non-redundant  
 20 contigs after de-replication at 95% ANI over 85% the length of both sequences. B-E)  
 21 Summary statistics across the 751,567 DTR contigs before filtering. B) Distribution of the  
 22 length of direct terminal repeats (DTRs). A considerable number of DTRs occur at specific  
 23 lengths (e.g. 55, 77, 99 bp). These odd-numbered lengths likely correspond with k-mer  
 24 lengths utilized by various metagenomic assembly tools. When faced with assembling  
 25 reads from a circular template, they appear to break the contig in a random location and  
 26 leave behind a repeated sequence at the start and end of the contig equal to the k-mer  
 27 length. C) The length (log scale) of all DTR contigs. D-E) A small number of contigs are  
 28 likely false positives due to a low complexity repeat (e.g. AAAAAA...) or a highly repetitive  
 29 repeat (i.e. occurring not just at termini). F) After removing spurious complete genomes,  
 30 the DTR contigs were screened for viral signatures, revealing 116,666 viral contigs. These  
 31 were identified using a combination of CheckV's marker genes, plasmid genes from recent  
 32 publications, and VirFinder [1].

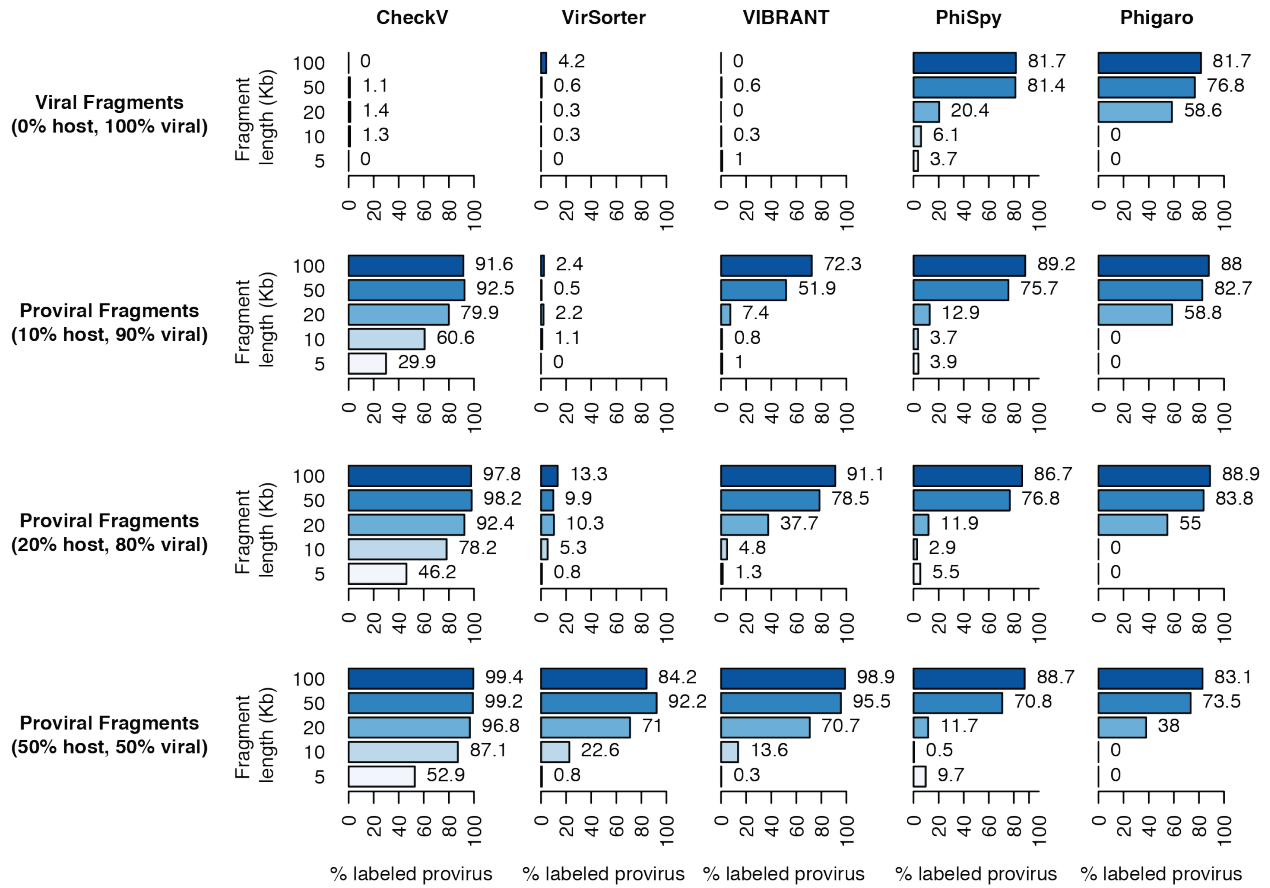

34  
35

36 **Figure S4. Provirus classification accuracy for CheckV and other tools.** Proviral  
37 genome fragments were generated at various read lengths (5 to 100 kb) and levels of host  
38 contamination (0 to 50%) and used as input to CheckV and other tools. A fragment was  
39 classified as a provirus if it contained a predicted viral region that covered < 95% of the  
40 fragment length.

A

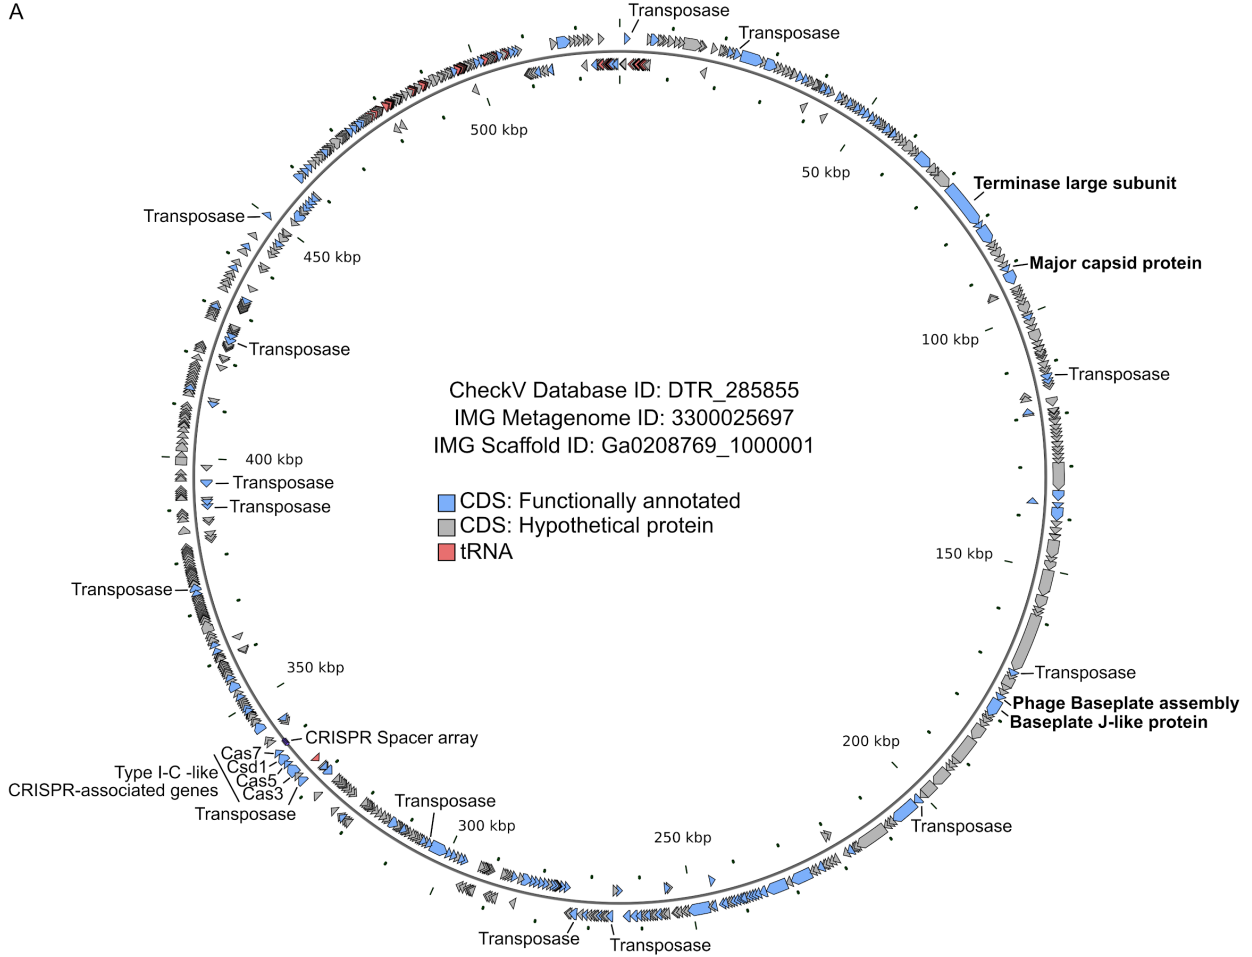

B

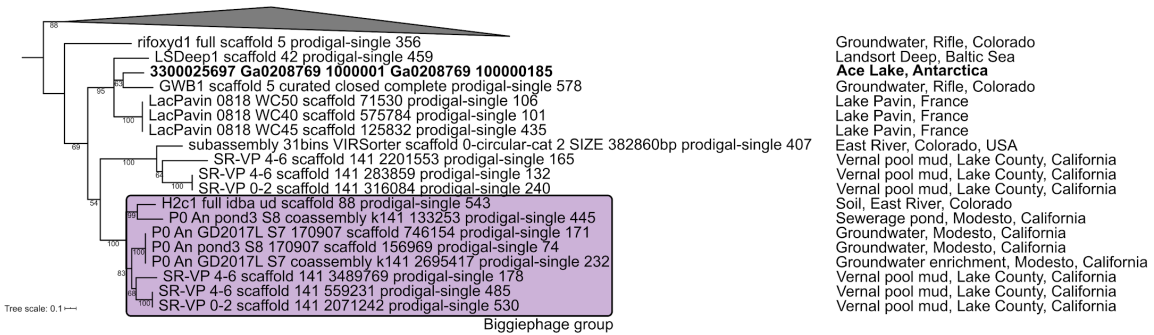

41  
 42  
 43  
 44  
 45  
 46  
 47

**Figure S5. Genome map and phylogeny of contig Ga0222679\_1000001.** A. Genome map of putative circular contig Ga0222679\_1000001. Annotations were obtained from IMG [2] and manual annotation of phage proteins (terminase and major capsid protein) via HHPred [3].

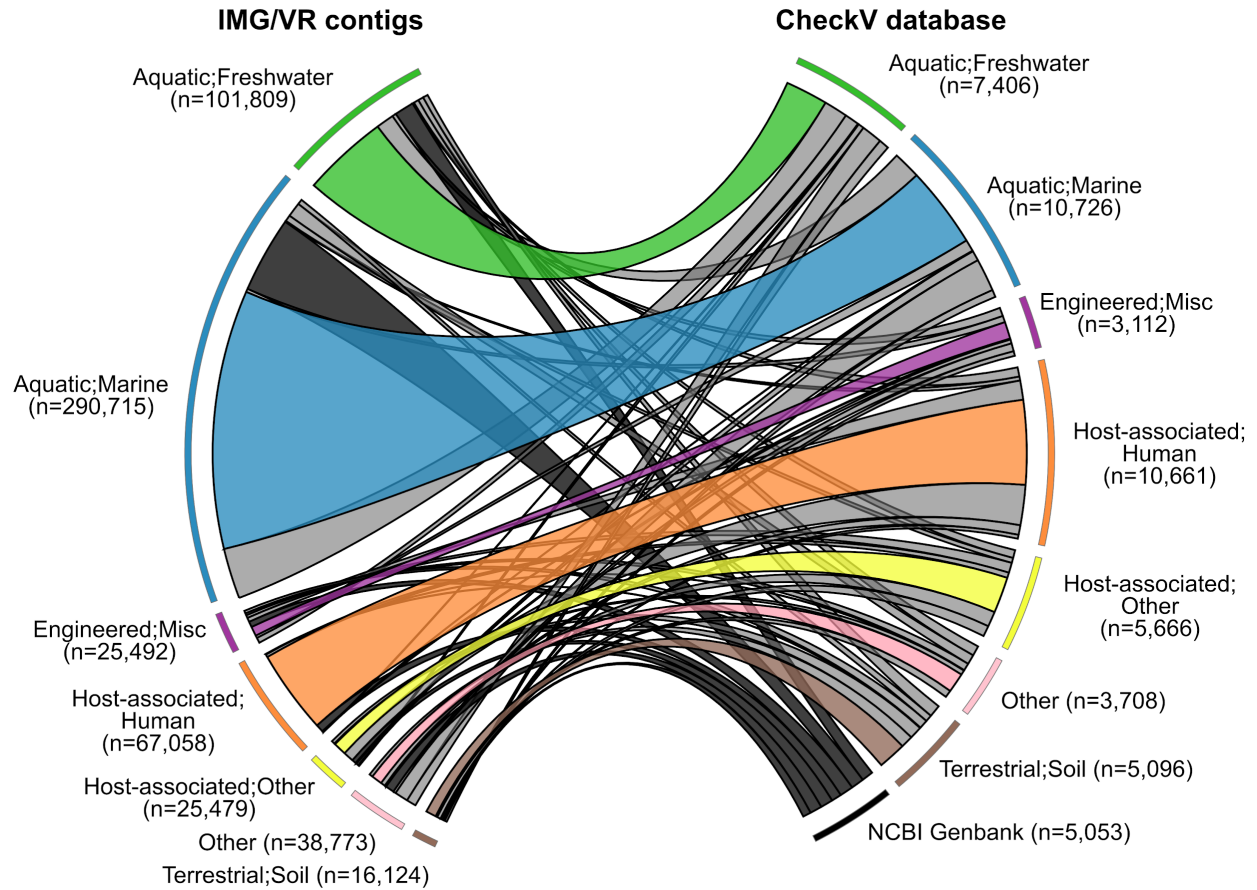

48  
 49  
 50  
 51  
 52  
 53  
 54  
 55  
 56  
 57  
 58  
 59  
 60  
 61  
 62  
 63  
 64  
 65  
 66

**Figure S6. Association between IMG/VR contigs and CheckV reference genomes.** IMG/VR contigs (left) are classified by the biome of their original metagenomes and connected to the top hit in the CheckV database (right). Cases in which a reference contig is used to estimate the genome of an IMG/VR sequence from the same biome (e.g. marine IMG/VR contig and marine CheckV reference) are colored by biome, while other cases are colored in grey.

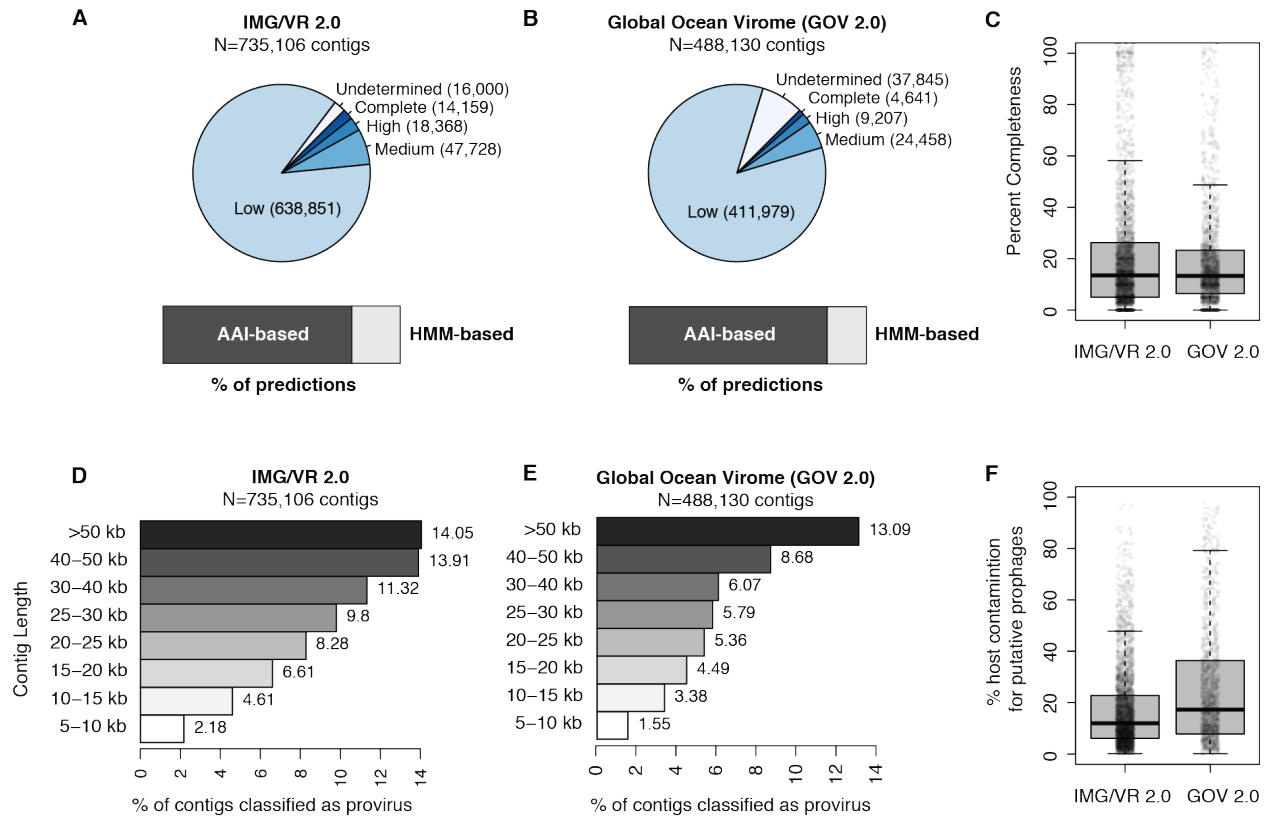

67  
68  
69  
70  
71  
72  
73  
74  
75  
76  
77  
78  
79  
80  
81  
82  
83  
84  
85  
86  
87  
88

**Figure S7. Application of CheckV to IMG/VR and the Global Ocean Virome datasets.** A) Quality tiers across viral contigs from IMG/VR 2.0 [4] and B) the GOV 2.0 dataset [5]. The bar plots indicate the % of completeness estimates made with the AAI- or HMM-based approaches. C) Distribution of completeness across contigs from each dataset. D) Percent of contigs classified as a provirus for IMG/VR 2.0. and E) for GOV 2.0. F) Host contamination (i.e. percent of length derived from host regions) across datasets.

## 89 **Supplementary text**

90

### 91 **Investigating DTR contigs classified as *Retrovirales* and *Riboviria***

92

93 Since genomes from *Retrovirales* and *Riboviria* (i.e. RNA viruses) are typically linear, we  
94 further analyzed DTR sequences affiliated to these clades to identify putative errors or  
95 misannotation. For *Retrovirales*, most sequences with DTR (>97%) were  $\leq 15\text{kb}$ , which is  
96 consistent with the size range of complete retrovirus genomes. A best blast hit affiliation of  
97 these contigs against NCBI Viral RefSeq revealed that the vast majority (>90%) were most  
98 similar to *Metaviridae*, i.e. retrotransposon-like with long terminal repeats. The second  
99 most common group to which these sequences were affiliated was the *Caulimoviridae*  
100 family, with a circular genome. Hence, DTR contigs affiliated to *Retrovirales* seemingly  
101 represented genuine complete viral genomes and/or retrotransposons.

102

103 For *Riboviria*, >97% of the DTR contigs were  $\leq 15\text{kb}$ , which is a plausible size for complete  
104 RNA virus genomes. A more detailed gene annotation of the 101 representative contigs for  
105 these DTR sequences affiliated to *Riboviria* revealed 3 main groups. First, 68 contigs  
106 encoded an RdRP where the closest relative in NCBI Viral RefSeq was found within the  
107 Narna-like clade. Genomes from this RNA virus group, which includes mitoviruses, were  
108 previously observed to assemble as circular contig, likely either because of the existence of  
109 a circular form of the genome or because of a replication mechanism involving a  
110 concatemer intermediary [6, 7]. These contigs, which represent the majority of the set, thus  
111 likely represent genuine complete *Riboviria* genomes. Another set of 15 sequences lacked  
112 an RdRP or other clear taxonomic marker gene but shared similarity to uncharacterized  
113 genes in known *Riboviria* genomes. The last set of 18 DTR contigs could be identified as  
114 members of the CRESS-DNA group (i.e. ssDNA viruses), based on the presence of a  
115 replication-associated gene typical from this group. These sequences represent complete  
116 genomes but were mis-affiliated as *Riboviria* instead of CRESS-DNA and were therefore  
117 excluded from Figure 2B and Figure 2C.

118

### 119 **Additional analysis of the 528 kb viral contig from Ace Lake in Antarctica**

120

121 The IMG/VR contig (IMG contig ID: Ga0222679\_1000001) was identified from an Ace lake,  
122 Antarctica sample (IMG taxon ID: 3300022858) and predicted as complete based on the  
123 presence of a 127-bp DTR. The terminal repeat did not contain any low complexity regions  
124 and occurred three times on the contig (twice at termini and one other time). The contig  
125 was classified as viral based on a VirFinder p-value of 0.010 and score of 0.92 as well as the  
126 presence of 35 CheckV viral markers of 601 total protein-coding genes. Manual annotation  
127 also revealed the presence of a phage-like terminase large subunit (TerL) and a major  
128 capsid protein, two hallmark genes of phages in the *Caudovirales* order. 19 CheckV  
129 microbial markers were found, but these were interspersed between viral genes and did  
130 not result in CheckV predicting any host regions. A self-alignment of the contig with blastn  
131 did not reveal any large duplicated regions beyond the 127-bp DTR.

132

133 To validate circularity, we first ran CheckV and obtained an estimated completeness of  
134 100%. The completeness estimate was based on a 100% ANI / 99.8% AF match to a CheckV  
135 sequence (DTR\_285855) that was derived from a different sample from the same lake (IMG  
136 taxon ID: 3300025697, IMG contig ID: Ga0208769\_1000001). As further validation, we  
137 performed read mapping from the sample (sequencing project ID: 1166905) to the 528,258  
138 bp circular contig in order to test whether any reads spanned the circular breakpoint. After  
139 mapping with Bowtie 2 [8] using default options, we discarded paired end reads with more  
140 than 2 mismatches and discarded reads mapped to the same strand. After these filters  
141 107,332 reads were mapped to the contig with a median insert length of 311 bp and read  
142 length of 150 bp. Supporting the circularity, we identified 10 reads with an insert length of  
143 528,046 bp that spanned nearly the entire contig; assuming these reads instead spanned  
144 the circular breakpoint, then their insert lengths would instead be 212 bp, which is  
145 plausible for this dataset.

146  
147 While *Caudovirales* genomes are typically ~50kb, larger genomes of ~500kb have been  
148 reported [9]. Recently, a set of new large ( $\geq 200$ kb) phages were reported from  
149 metagenome assemblies from which 10 major clades were proposed [10]. Based on a TerL  
150 phylogeny, contig Ga0208769\_1000001 seems to be a new virus related to one of these  
151 clades (“Biggiephage”, Figure S3B). Several members of the Biggiephage clade encode  
152 CRISPR arrays [10], and similarly contig Ga0208769\_1000001 encodes a Type I-C-like  
153 CRISPR array (Figure S3A). No host could be predicted for Ga0208769\_1000001 as no  
154 significant match was identified between this contig and the IMG CRISPR spacer database.  
155 Similarly, no significant match was identified between the spacers encoded on contig  
156 Ga0208769\_1000001 and other Ace Lake contigs, hence it is unclear at this stage which  
157 elements are targeted by this CRISPR array. Finally, contig Ga0208769\_1000001 included  
158 an unusually high number of transposases (14) distributed throughout the sequence, which  
159 suggests that mobile genetic elements may play a role in the large size of this genome.

- 160  
161 1. Ren, J., et al., *VirFinder: a novel k-mer based tool for identifying viral sequences from*  
162 *assembled metagenomic data*. *Microbiome*, 2017. **5**(1): p. 69.  
163 2. Chen, I.A., et al., *IMG/M v.5.0: an integrated data management and comparative*  
164 *analysis system for microbial genomes and microbiomes*. *Nucleic Acids Res*, 2019.  
165 **47**(D1): p. D666-D677.  
166 3. Zimmermann, L., et al., *A Completely Reimplemented MPI Bioinformatics Toolkit with*  
167 *a New HHpred Server at its Core*. *J Mol Biol*, 2018. **430**(15): p. 2237-2243.  
168 4. Paez-Espino, D., et al., *IMG/VR v.2.0: an integrated data management and analysis*  
169 *system for cultivated and environmental viral genomes*. *Nucleic Acids Res*, 2019.  
170 **47**(D1): p. D678-D686.  
171 5. Gregory, A.C., et al., *Marine DNA Viral Macro- and Microdiversity from Pole to Pole*.  
172 *Cell*, 2019. **177**(5): p. 1109-1123 e14.  
173 6. Bruenn, J.A., B.E. Warner, and P. Yerramsetty, *Widespread mitovirus sequences in*  
174 *plant genomes*. *PeerJ*, 2015. **3**: p. e876.  
175 7. Hintz, W.E., et al., *Two novel mitoviruses from a Canadian isolate of the Dutch elm*  
176 *pathogen Ophiostoma novo-ulmi (93-1224)*. *Virology*, 2013. **10**: p. 252.  
177 8. Langmead, B. and S.L. Salzberg, *Fast gapped-read alignment with Bowtie 2*. *Nat*  
178 *Methods*, 2012. **9**(4): p. 357-9.



- 179 9. Yuan, Y. and M. Gao, *Jumbo Bacteriophages: An Overview*. Front Microbiol, 2017. **8**: p.  
180 403.
- 181 10. Al-Shayeb, B., et al., *Clades of huge phages from across Earth's ecosystems*. Nature,  
182 2020. **578**(7795): p. 425-431.  
183
